# Supplementary material for: Fluorescent Azasteroids through Ultrasound Assisted Cycloaddition Reactions
Source: MDPI journal article supplement (doi:10.3390/molecules26165098), 2021-08-23
Supplement: s1 [file s1]

# Fluorescent azasteroids through ultrasound assisted cycloaddition reactions

Costel Moldoveanu <sup>1, \*</sup>, Ionel Mangalagiu <sup>1,2</sup> and Gheorghita Zbancioc <sup>1,\*</sup>

<sup>1</sup> Chemistry Department, Alexandru Ioan Cuza University of Iasi, 11 Carol 1st Bvd, Iasi -700506, Romania; ionelm@uaic.ro (I.M.)

<sup>2</sup> Integrated Centre of Environmental Science Studies in the North Eastern Region (CERNESIM), Alexandru Ioan Cuza University of Iasi, 11 Carol I, Iasi, 700506, Romania; ionelm@uaic.ro (I.M.)

\* Correspondence: costel.moldoveanu@uaic.ro (C.M.); gheorghita.zbancioc@uaic.ro (G.Z.) Tel.: +40-232-201278

## Contents

|                                                                        |    |
|------------------------------------------------------------------------|----|
| 1. NMR spectra of the obtained compounds.....                          | 2  |
| 2. IR spectra of the obtained compounds. ....                          | 12 |
| 3. <sup>1</sup> H-NMR studies on compound 7a at room temperature. .... | 16 |
| 4. UV spectra of the obtained compounds.....                           | 17 |
| 5. Emission spectra of the obtained compounds.....                     | 24 |
| 6. Absorption vs emission spectra of the obtained compounds .....      | 31 |

## 1. NMR spectra of the obtained compounds.

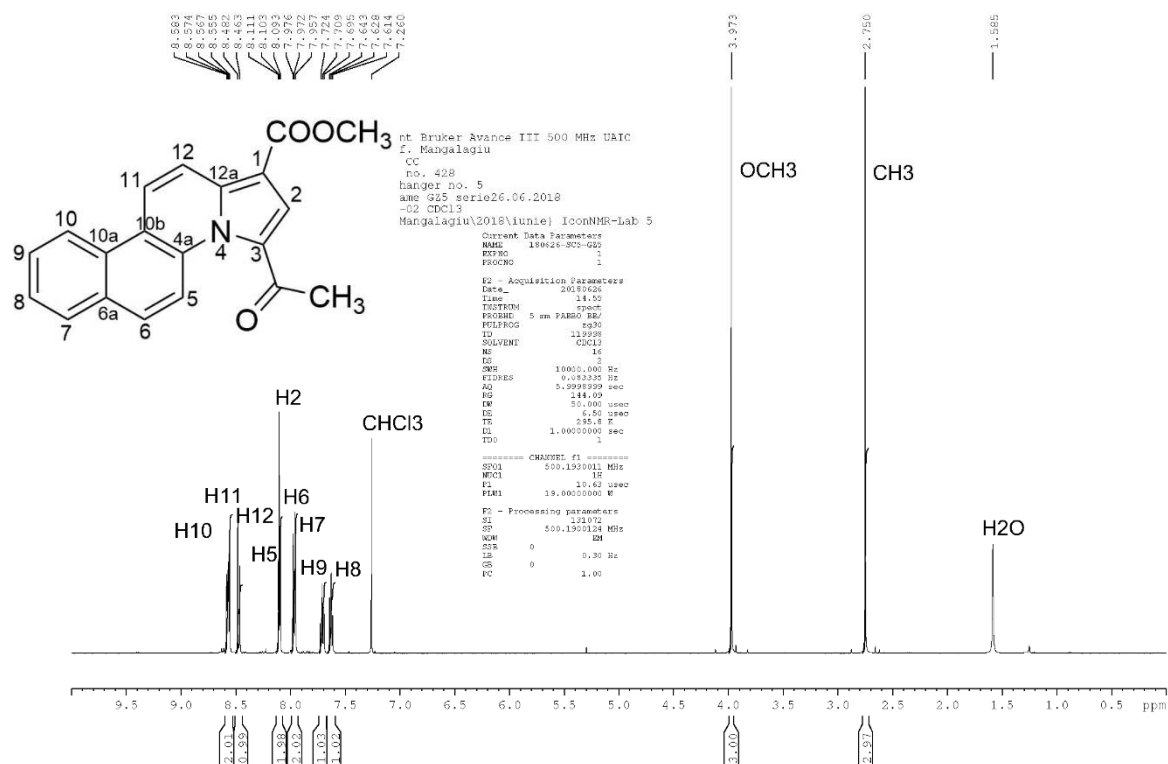

Figure S1a. <sup>1</sup>H NMR spectrum of the compound 5a.

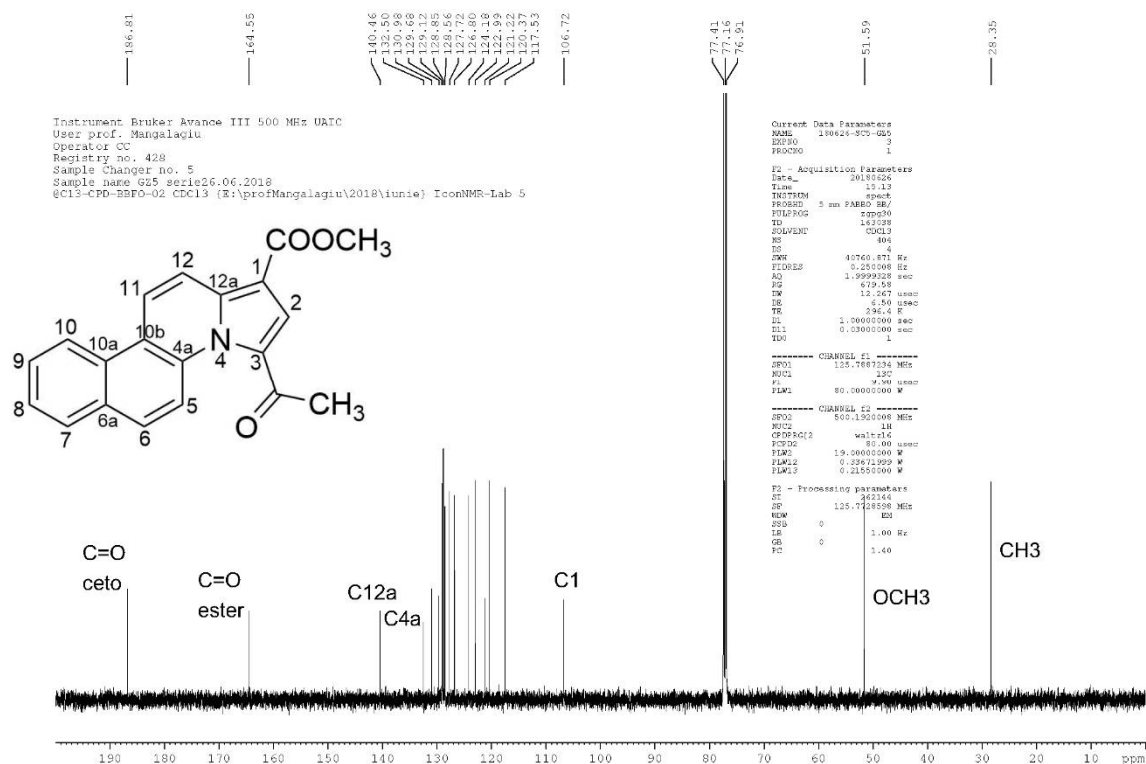

Figure S1b. <sup>13</sup>C NMR spectrum of the compound 5a.

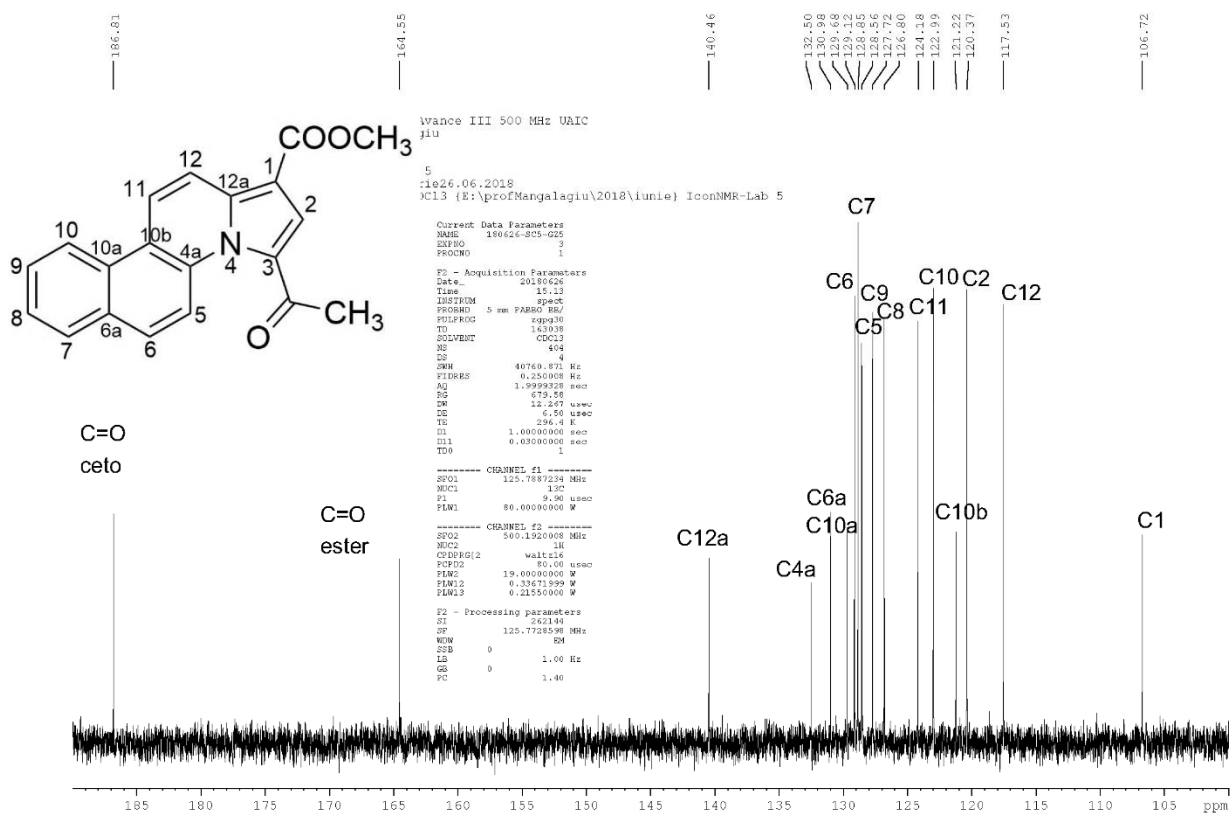

Figure S1c. Detail in the aromatic area of the  $^{13}\text{C}$  NMR spectrum of the compound 5a.

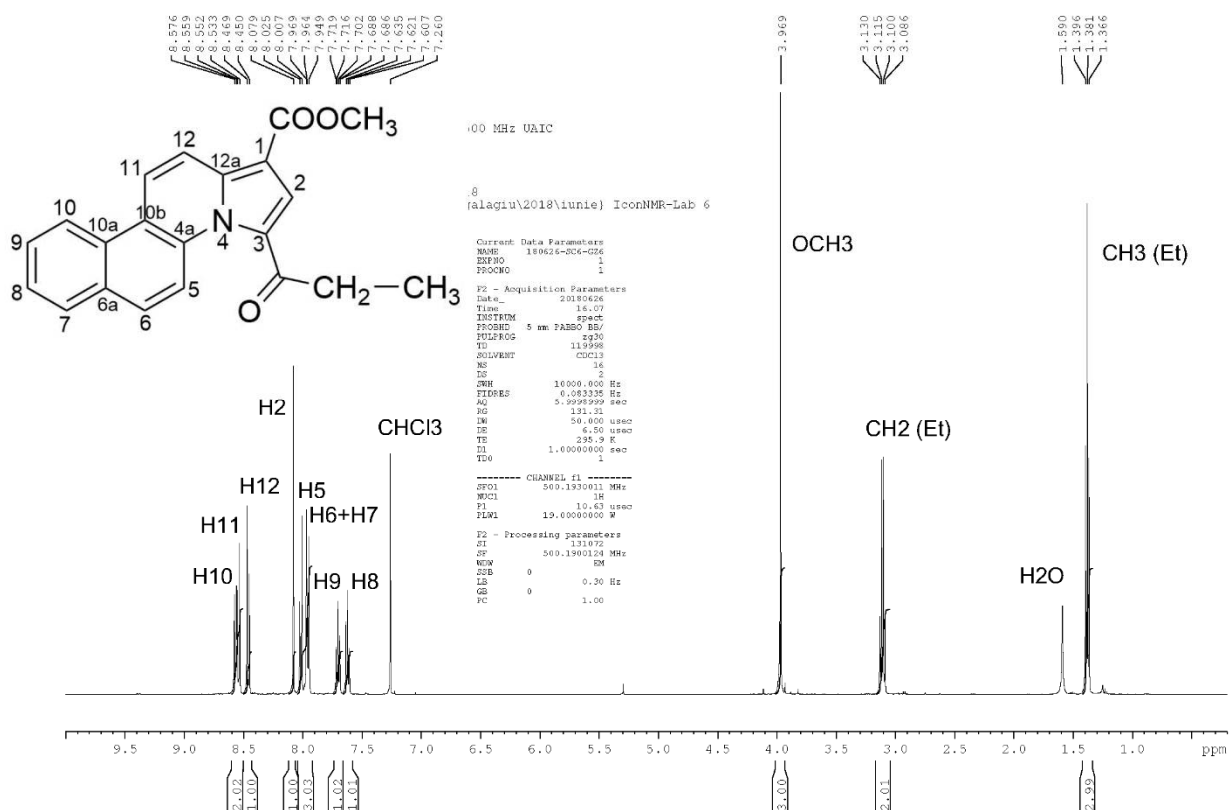

Figure S2a.  $^1\text{H}$  NMR spectrum of the compound 5b.

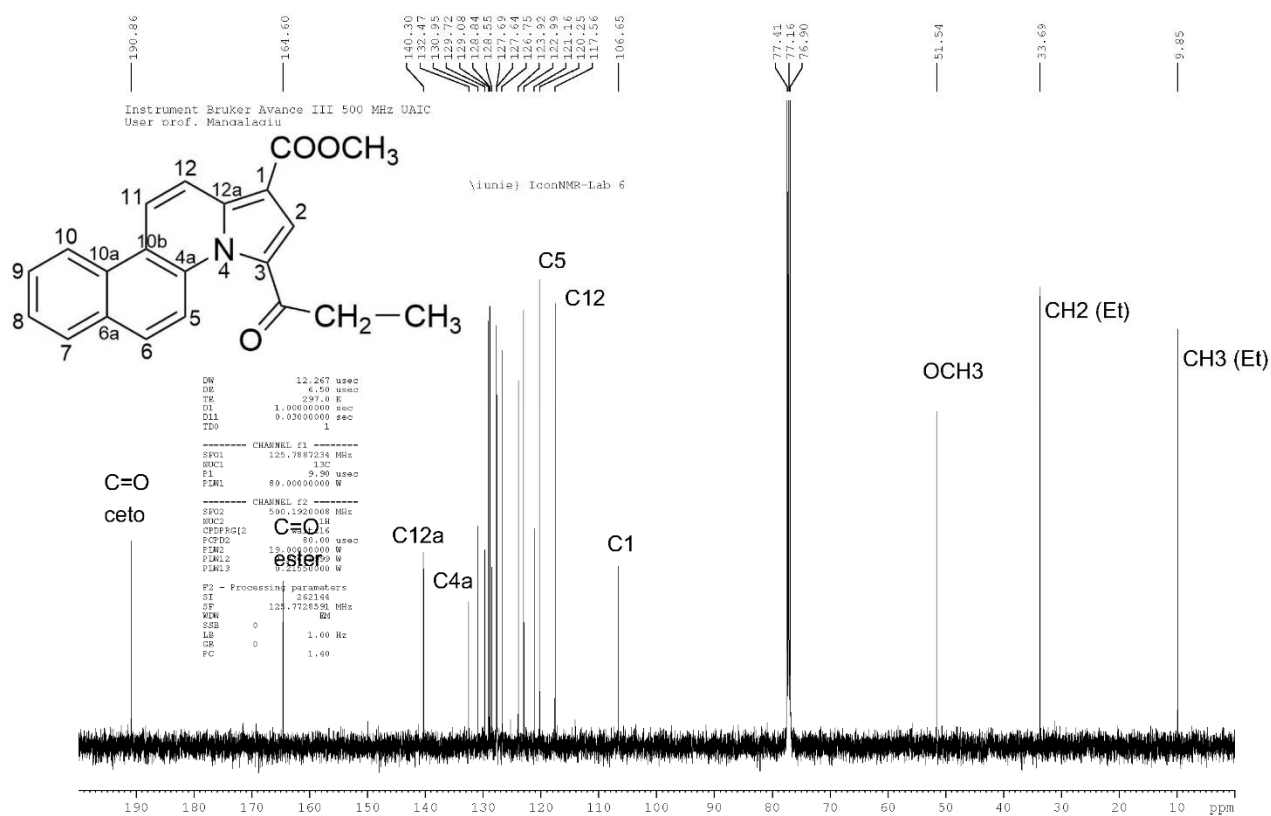

Figure S2b. <sup>13</sup>C NMR spectrum of the compound 5b.

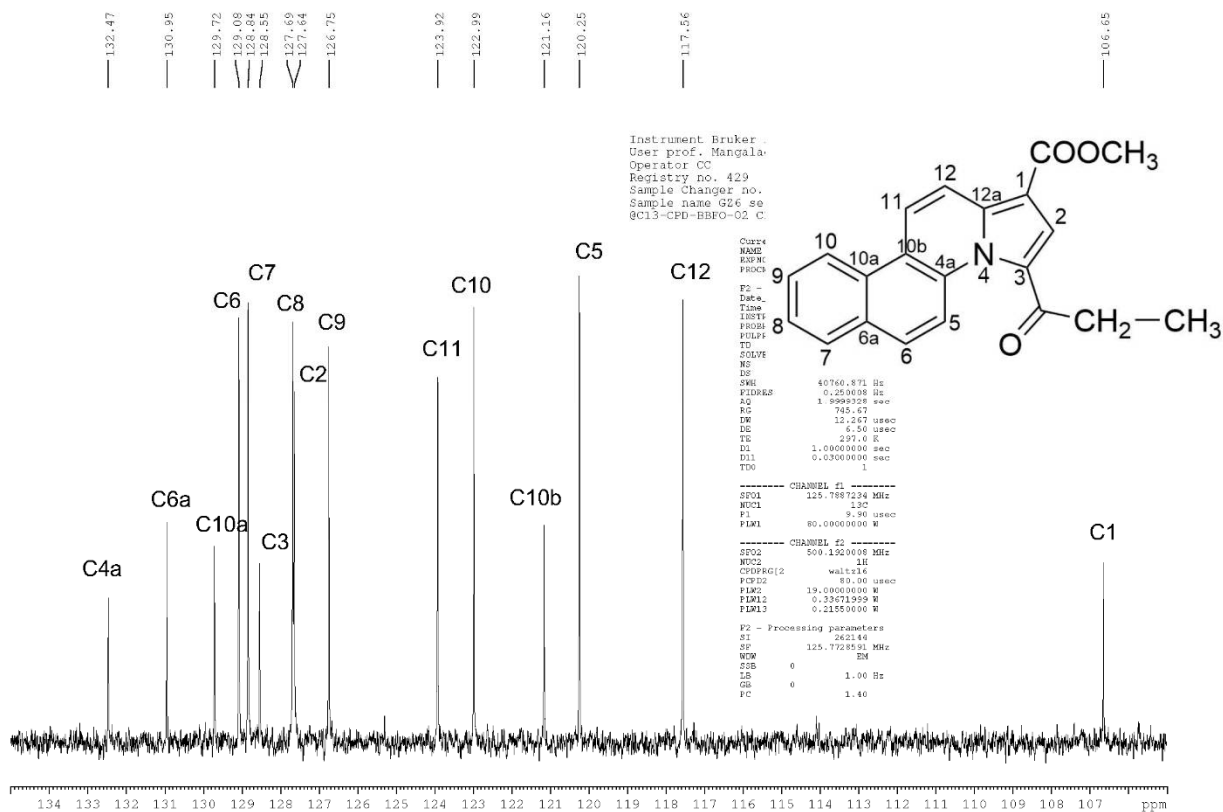

Figure S2c. Detail in the aromatic area of the <sup>13</sup>C NMR spectrum of the compound 5b.

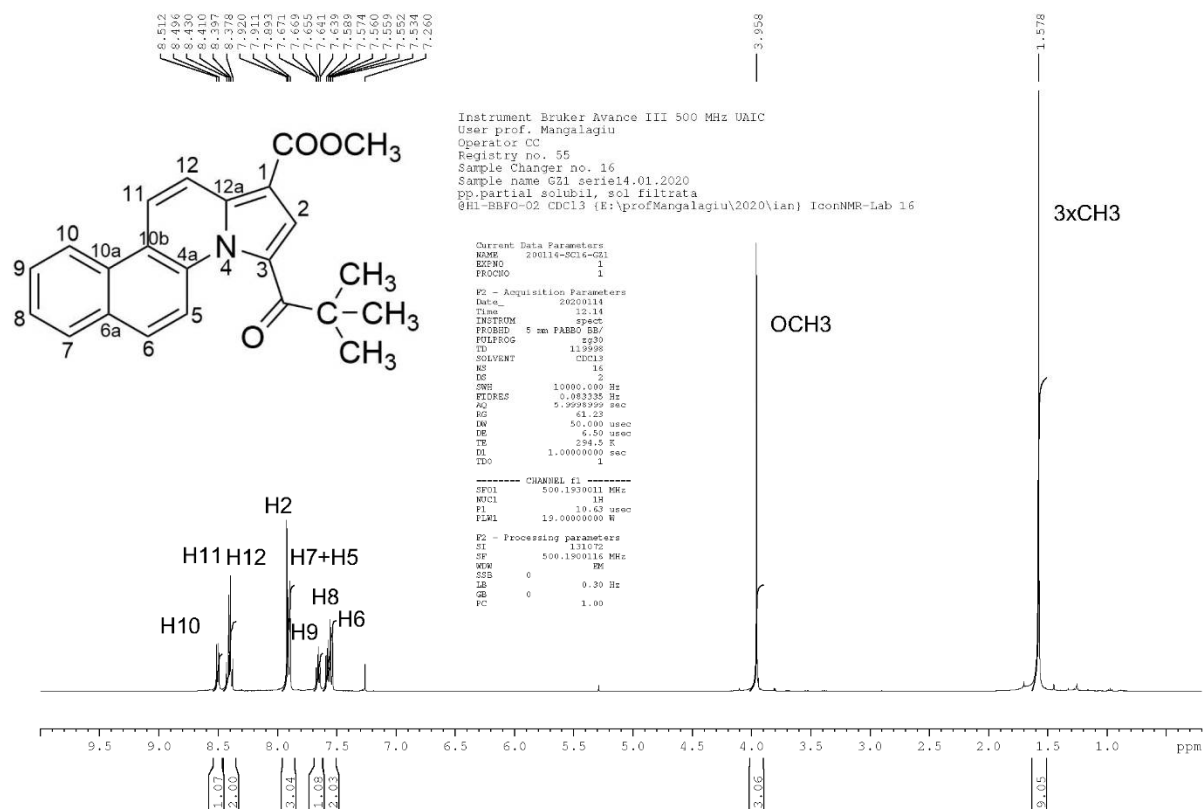

Figure S3a.  $^1\text{H}$  NMR spectrum of the compound 5c.

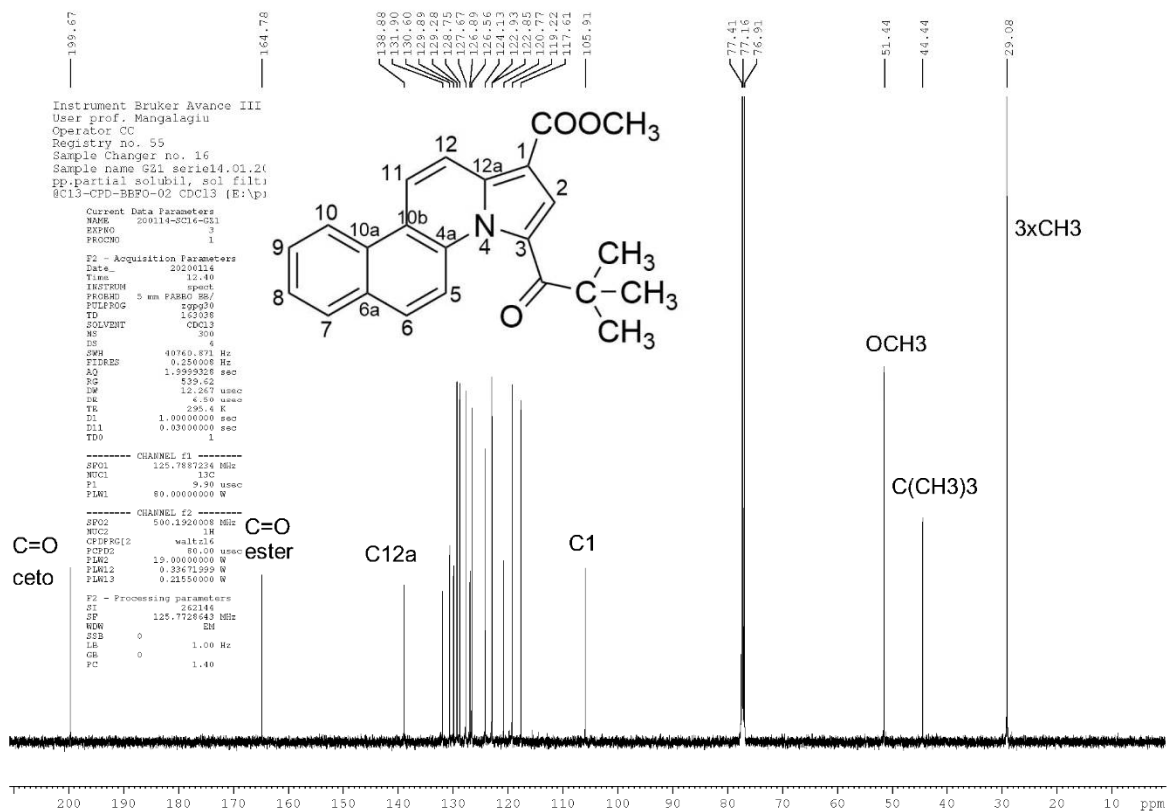

Figure S3b.  $^{13}\text{C}$  NMR spectrum of the compound 5c.

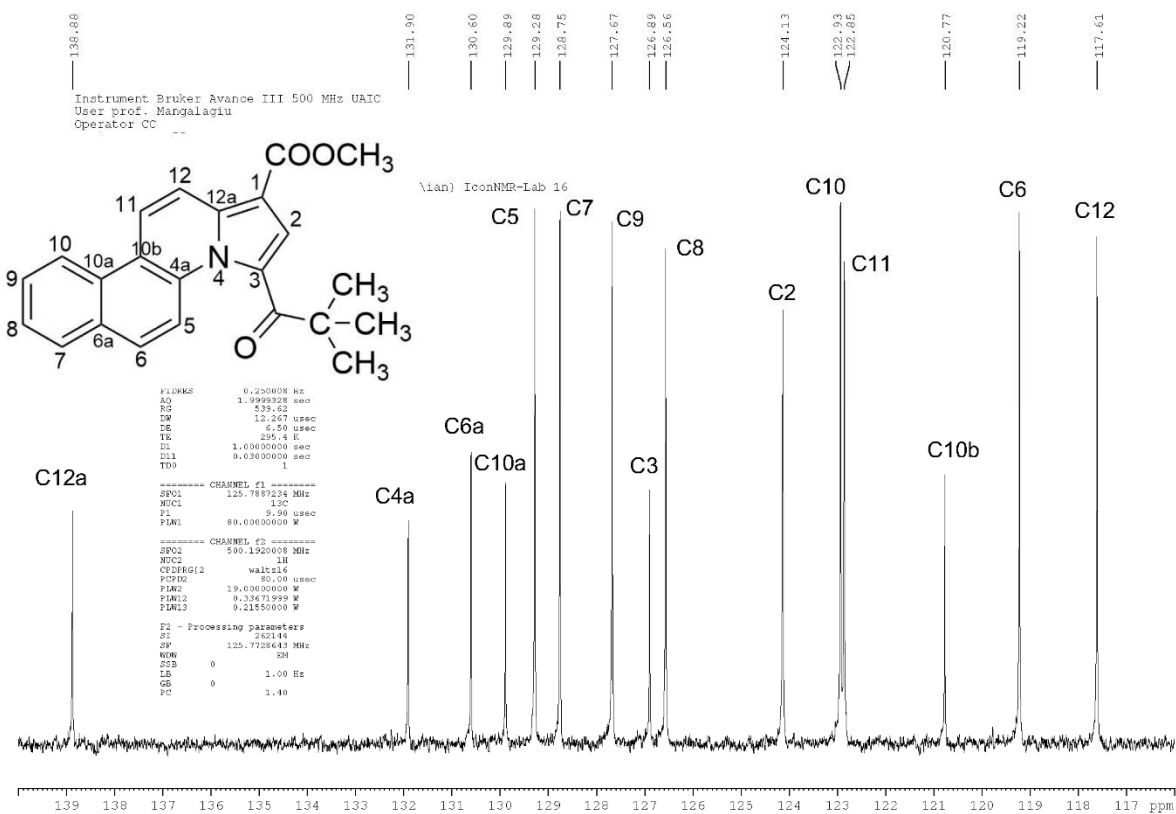

Figure S3c. Detail in the aromatic area of the  $^{13}\text{C}$  NMR spectrum of the compound 5c.

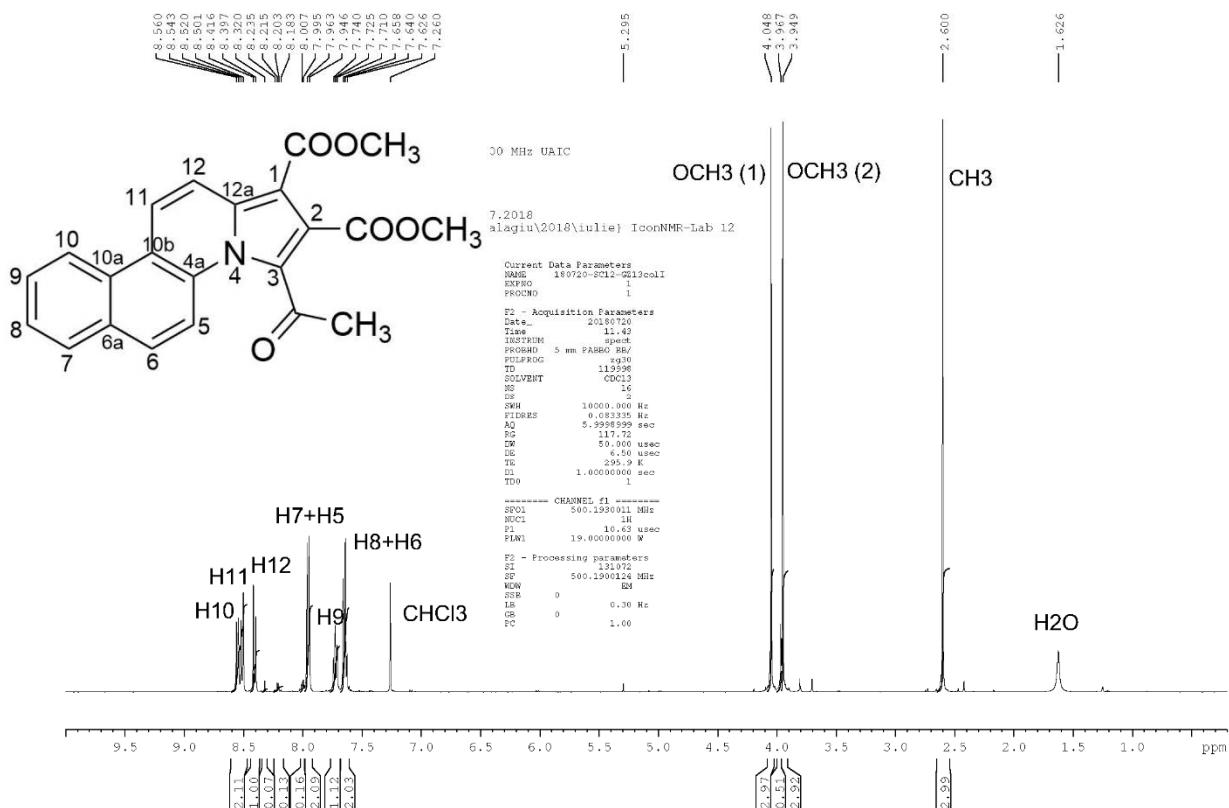

Figure S4a.  $^1\text{H}$  NMR spectrum of the compound 7a.

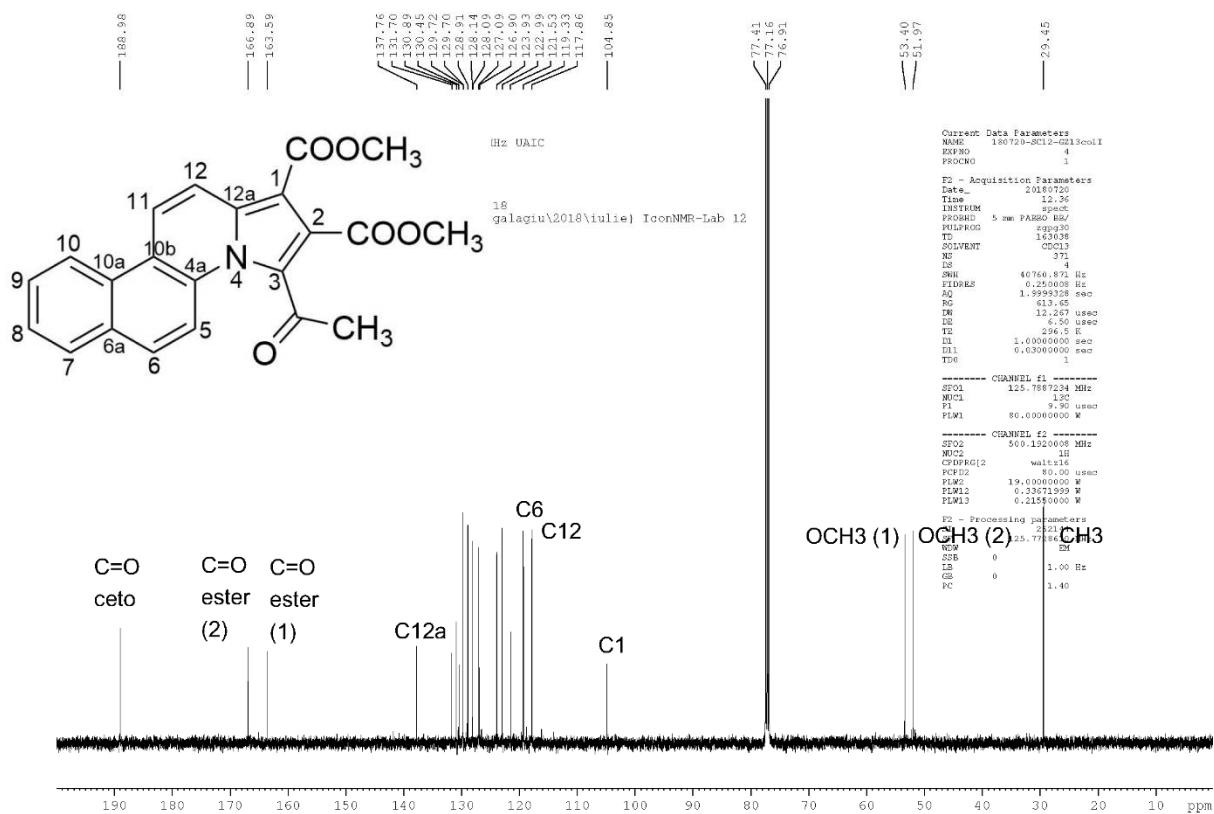

Figure S4b. <sup>13</sup>C NMR spectrum of the compound 7a.

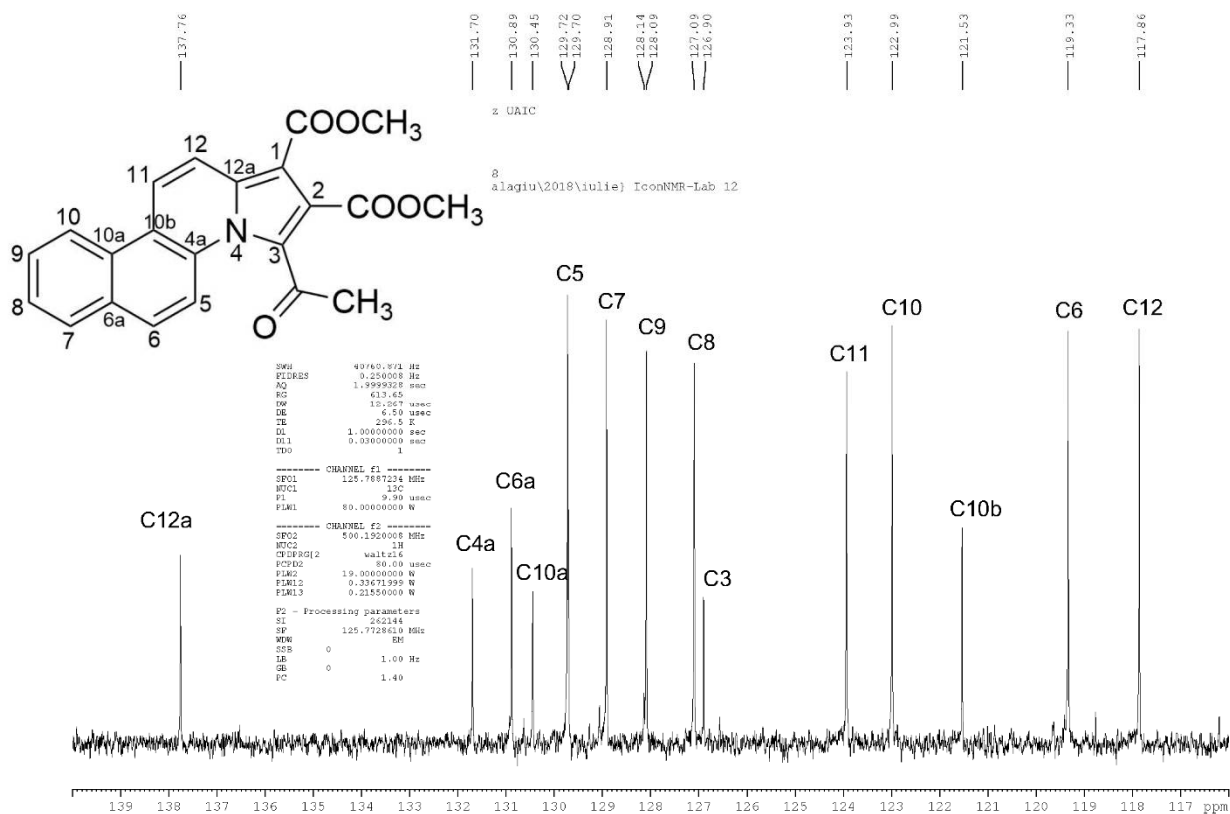

Figure S4c. Detail in the aromatic area of the <sup>13</sup>C NMR spectrum of the compound 7a.

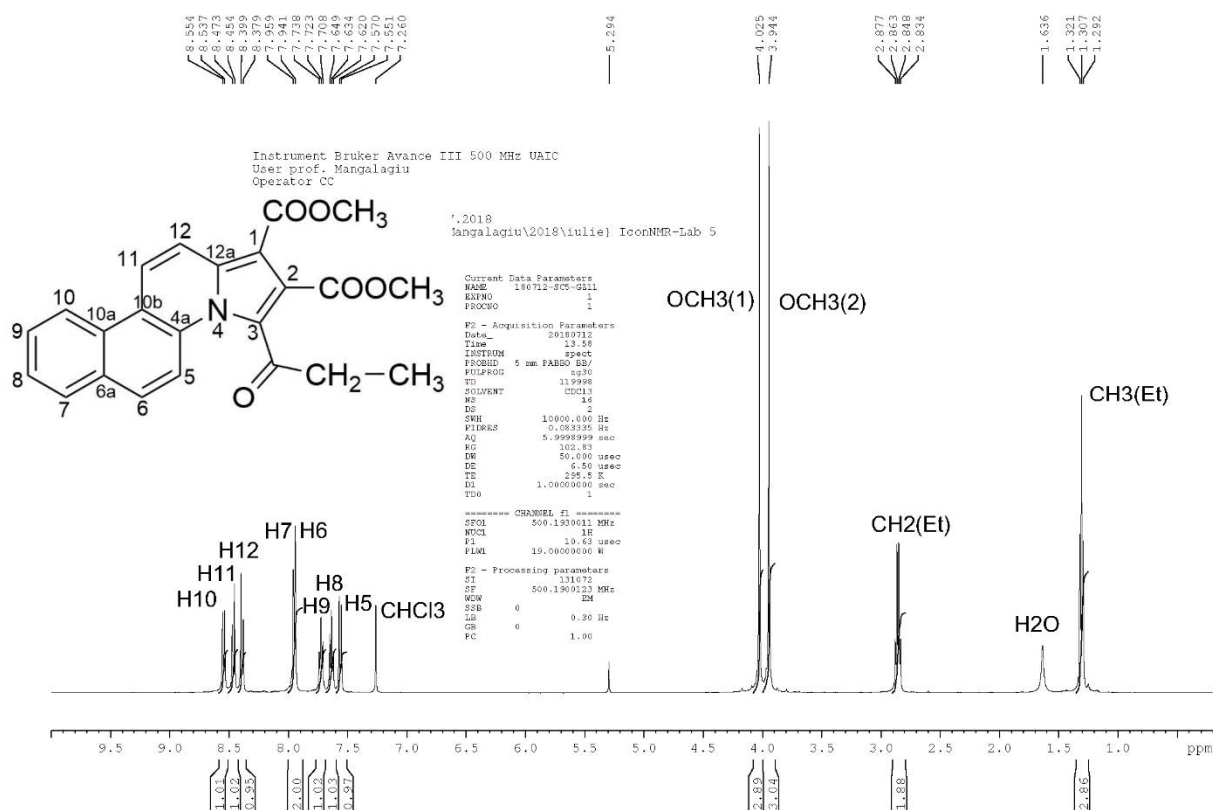

Figure S5a. <sup>1</sup>H NMR spectrum of the compound 7b.

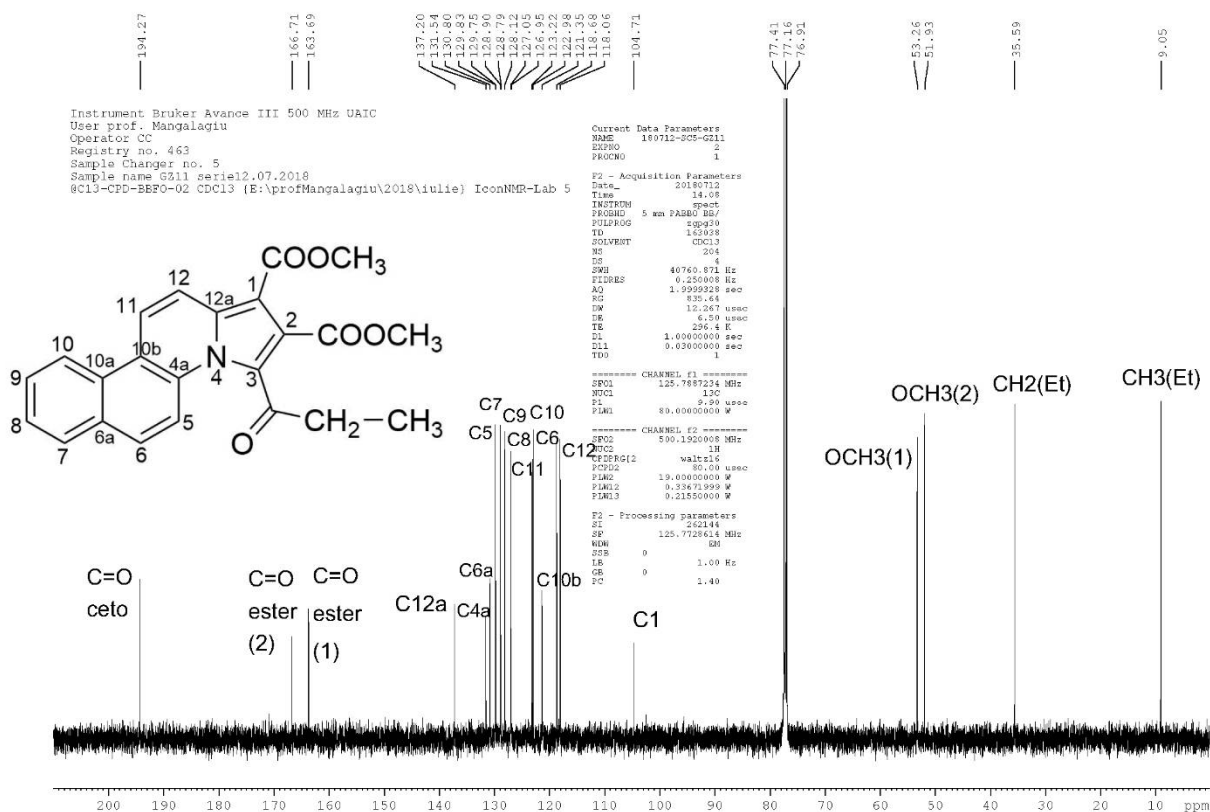

Figure S5b. <sup>13</sup>C NMR spectrum of the compound 7b.



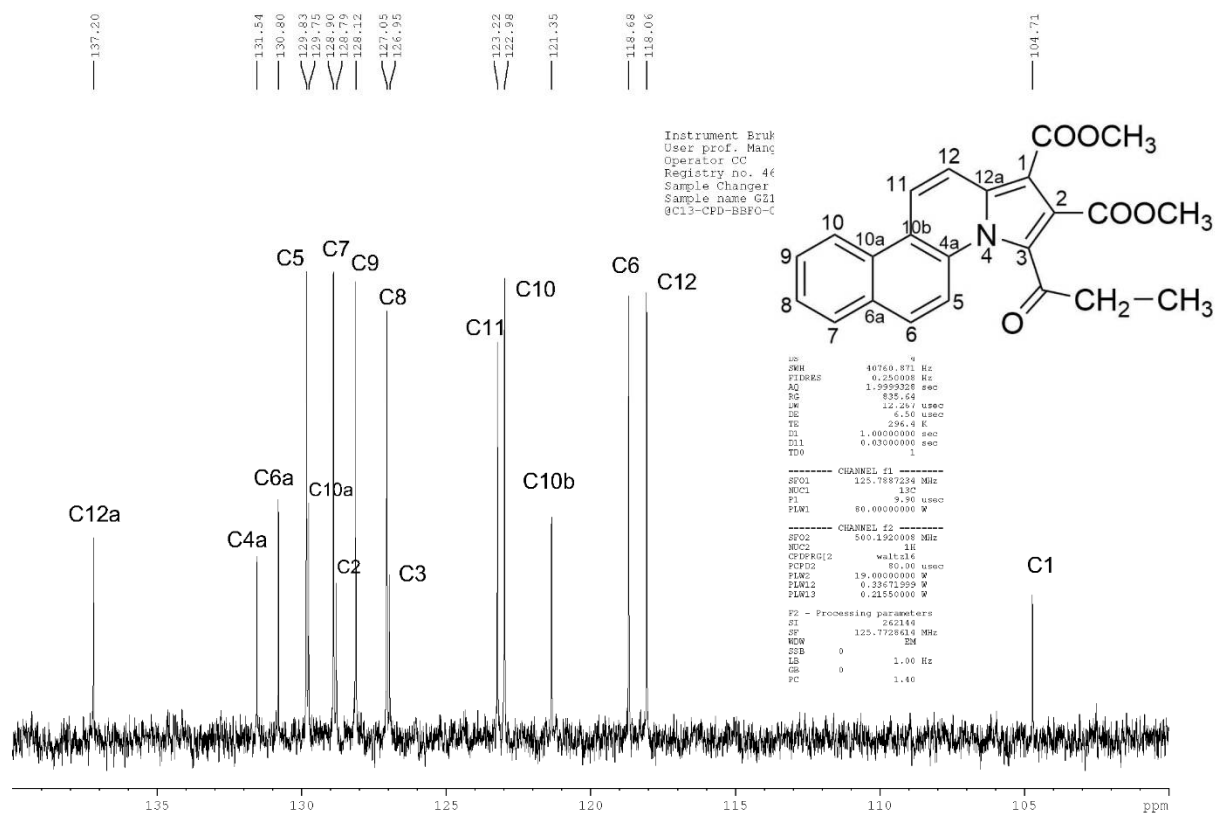

Figure S5c. Detail in the aromatic area of the  $^{13}\text{C}$  NMR spectrum of the compound 7b.

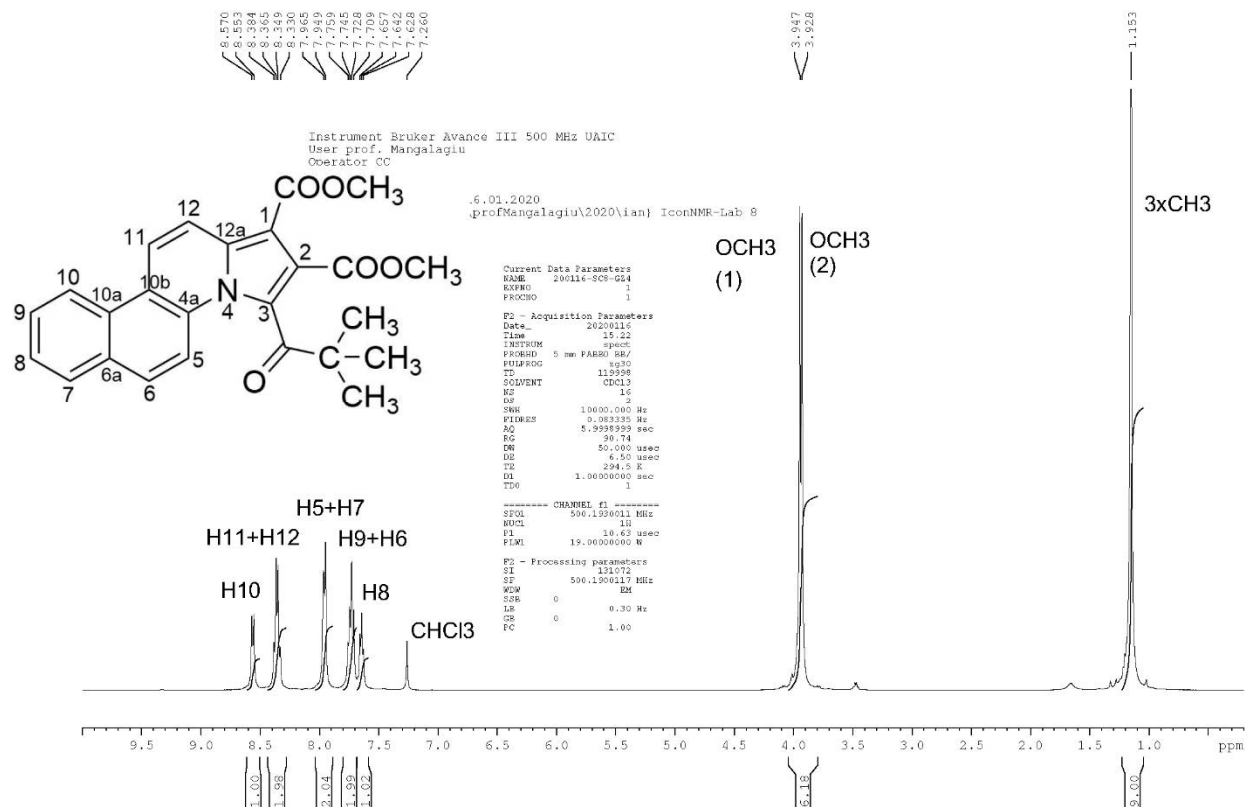

Figure S6a.  $^1\text{H}$  NMR spectrum of the compound 7c.

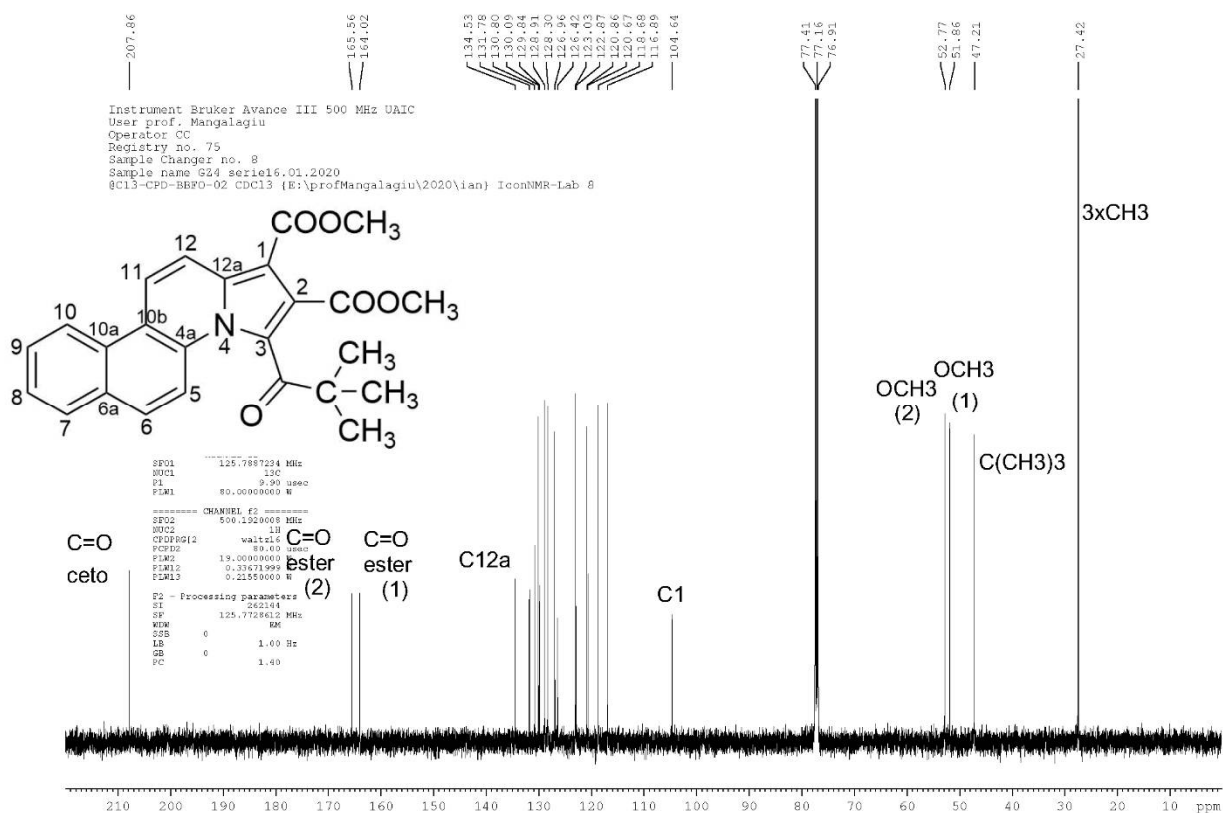

Figure S6b. <sup>13</sup>C NMR spectrum of the compound 7c.

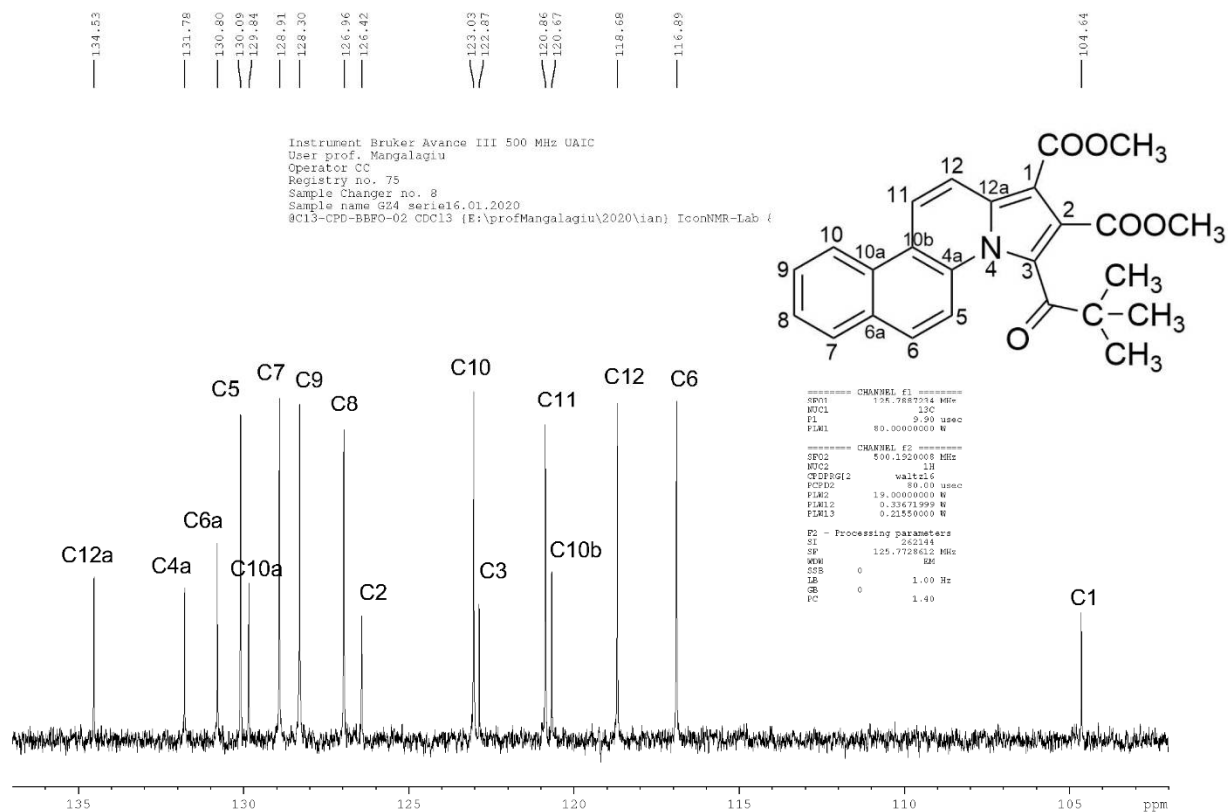

Figure S6c. Detail in the aromatic area of the <sup>13</sup>C NMR spectrum of the compound 7c.

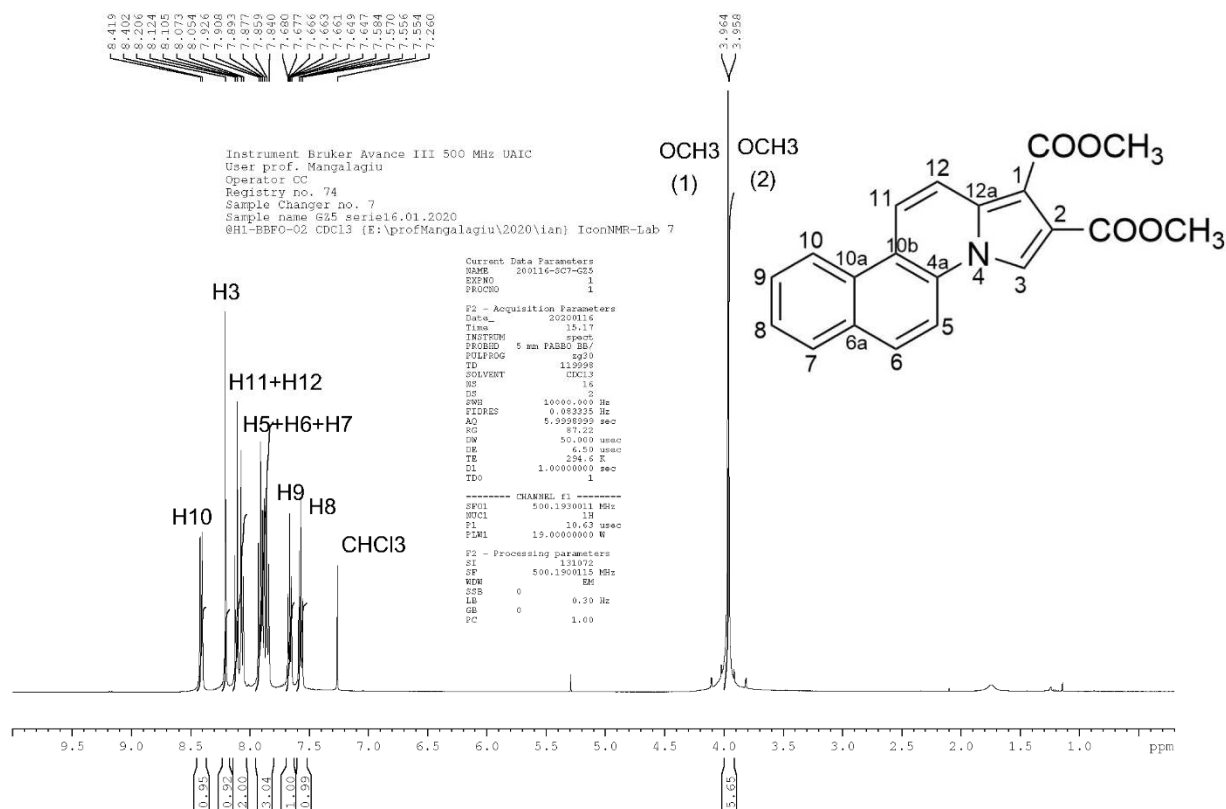

Figure S7a. <sup>1</sup>H NMR spectrum of the compound 8c.

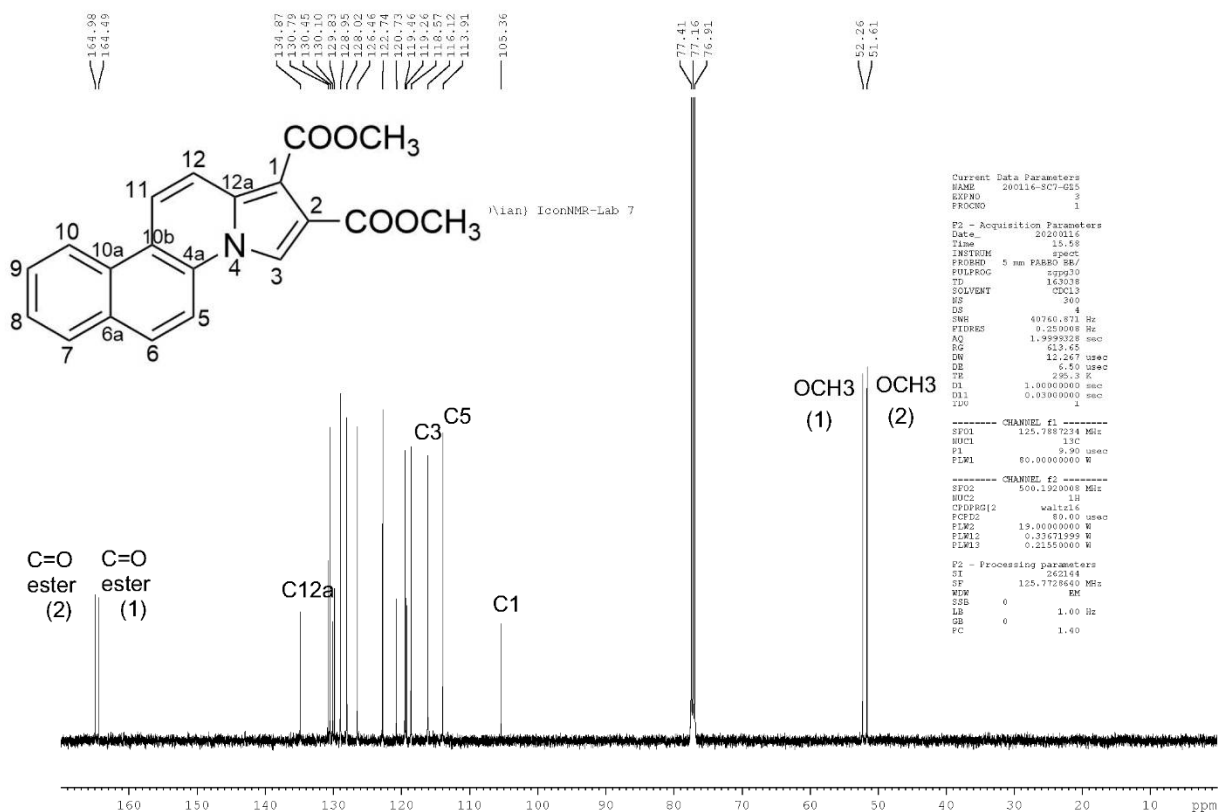

Figure S7b. <sup>13</sup>C NMR spectrum of the compound 8c.



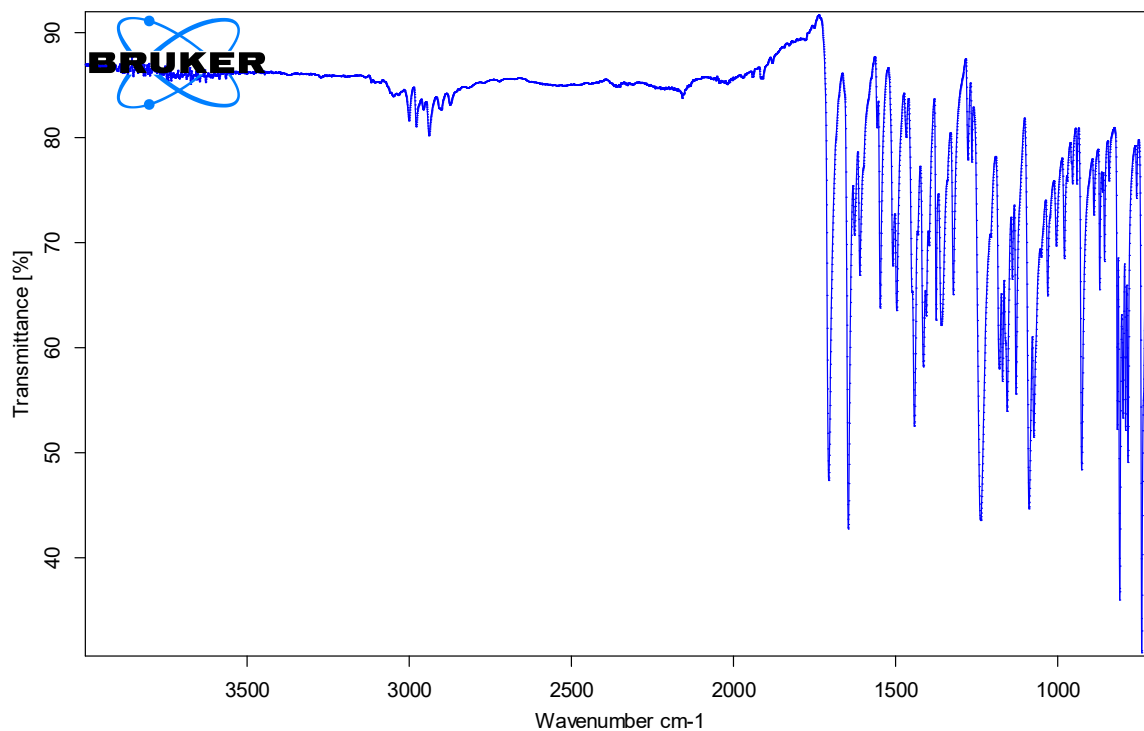

|                                                 |                    |                                    |            |
|-------------------------------------------------|--------------------|------------------------------------|------------|
| C:\OPUS_7.0.129\WORK\2021-07-14\2021-07-14-5B.0 | Sample description | Instrument type and / or accessory | 14/07/2021 |
|-------------------------------------------------|--------------------|------------------------------------|------------|

Page 1/1

Figure S9. IR spectrum of the compound 5b.

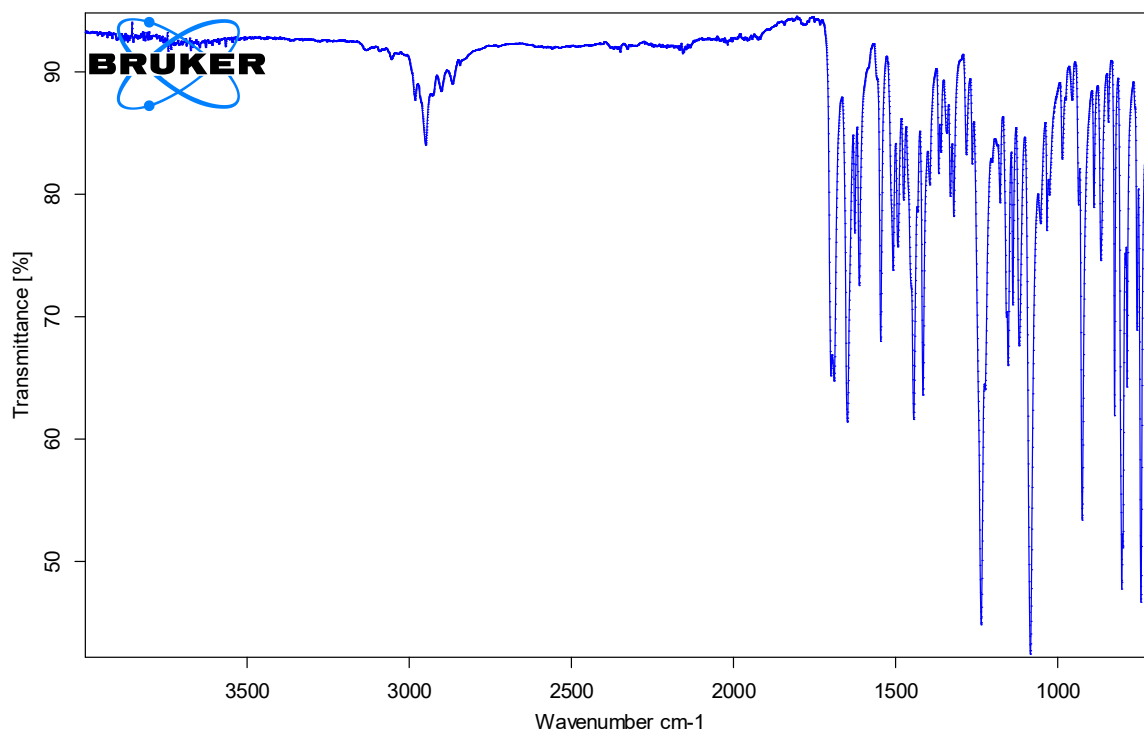

|                                                 |                    |                                    |            |
|-------------------------------------------------|--------------------|------------------------------------|------------|
| C:\OPUS_7.0.129\WORK\2021-07-14\2021-07-14-5C.0 | Sample description | Instrument type and / or accessory | 14/07/2021 |
|-------------------------------------------------|--------------------|------------------------------------|------------|

Page 1/1

Figure S10. IR spectrum of the compound 5c.

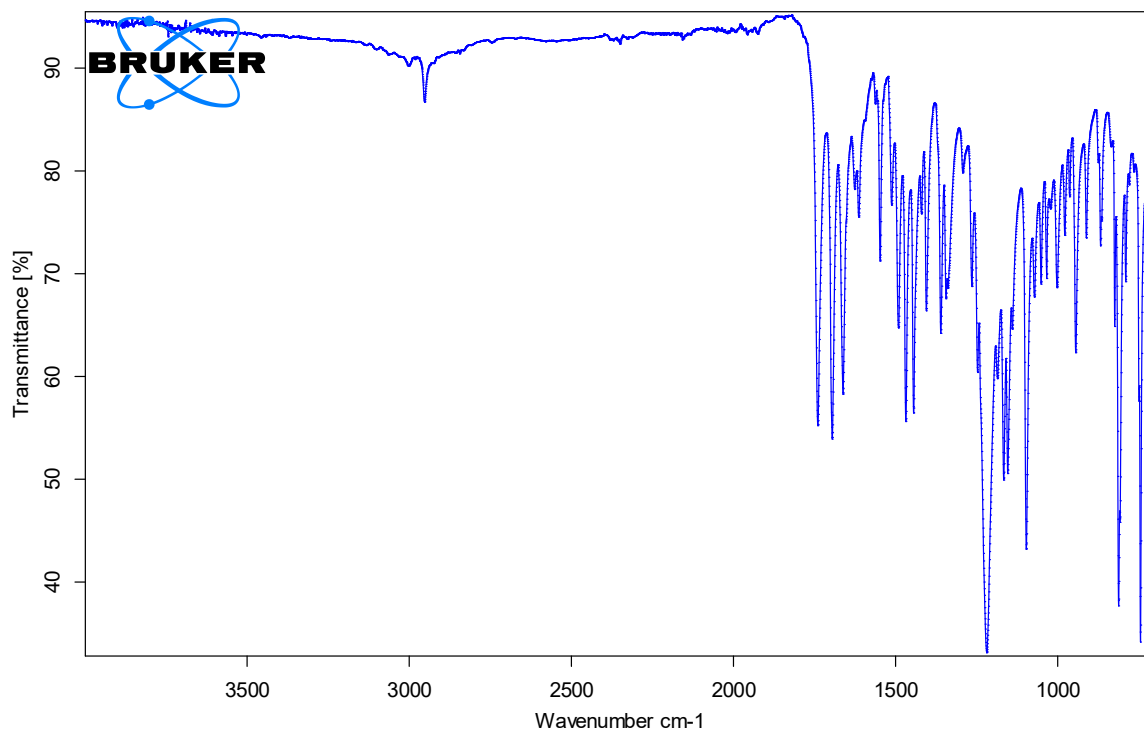

|                                                 |                    |                                    |            |
|-------------------------------------------------|--------------------|------------------------------------|------------|
| C:\OPUS_7.0.129\WORK\2021-07-14\2021-07-14-7A.0 | Sample description | Instrument type and / or accessory | 14/07/2021 |
|-------------------------------------------------|--------------------|------------------------------------|------------|

Page 1/1

Figure S11. IR spectrum of the compound **7a**.

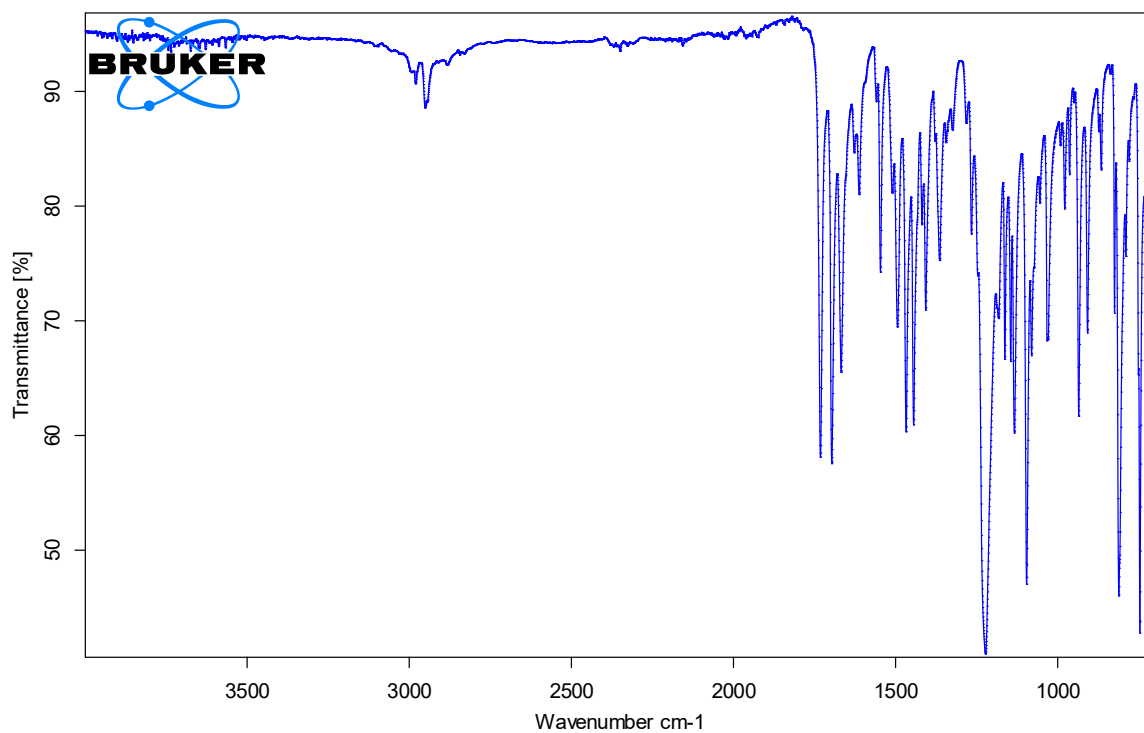

|                                                 |                    |                                    |            |
|-------------------------------------------------|--------------------|------------------------------------|------------|
| C:\OPUS_7.0.129\WORK\2021-07-14\2021-07-14-7B.0 | Sample description | Instrument type and / or accessory | 14/07/2021 |
|-------------------------------------------------|--------------------|------------------------------------|------------|

Page 1/1

Figure S12. IR spectrum of the compound **7b**.

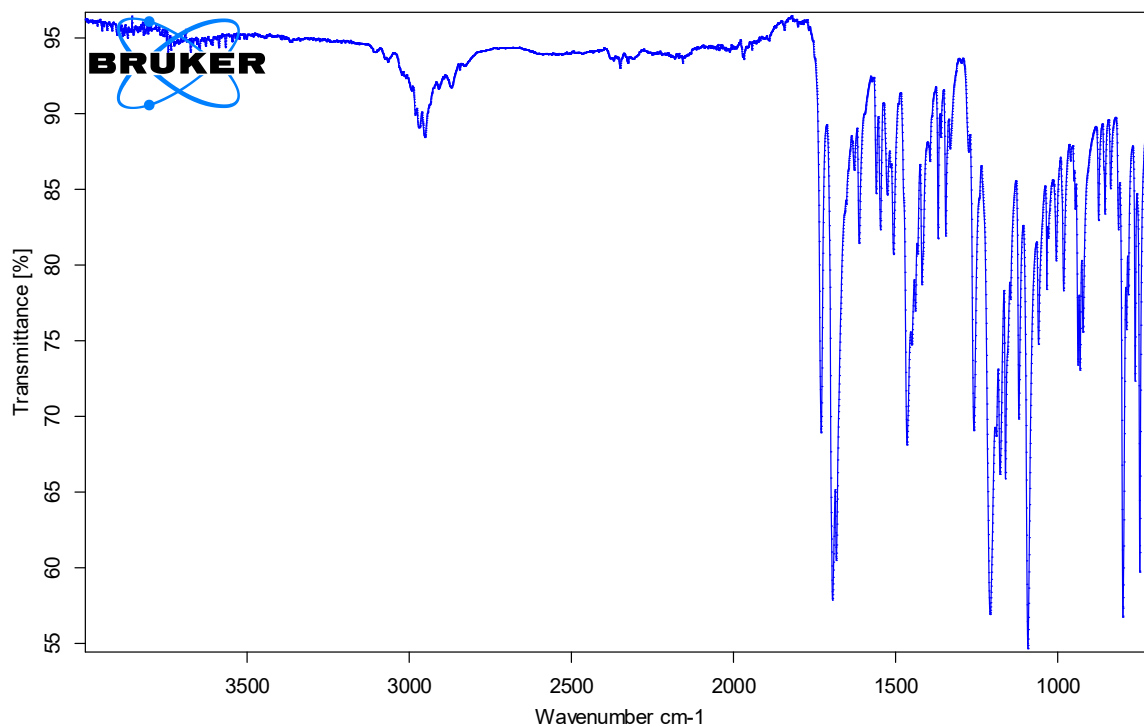

|                                                 |                    |                                    |            |
|-------------------------------------------------|--------------------|------------------------------------|------------|
| C:\OPUS_7.0.129\WORK\2021-07-14\2021-07-14-7C.1 | Sample description | Instrument type and / or accessory | 14/07/2021 |
|-------------------------------------------------|--------------------|------------------------------------|------------|

Page 1/1

Figure S13. IR spectrum of the compound 7c.

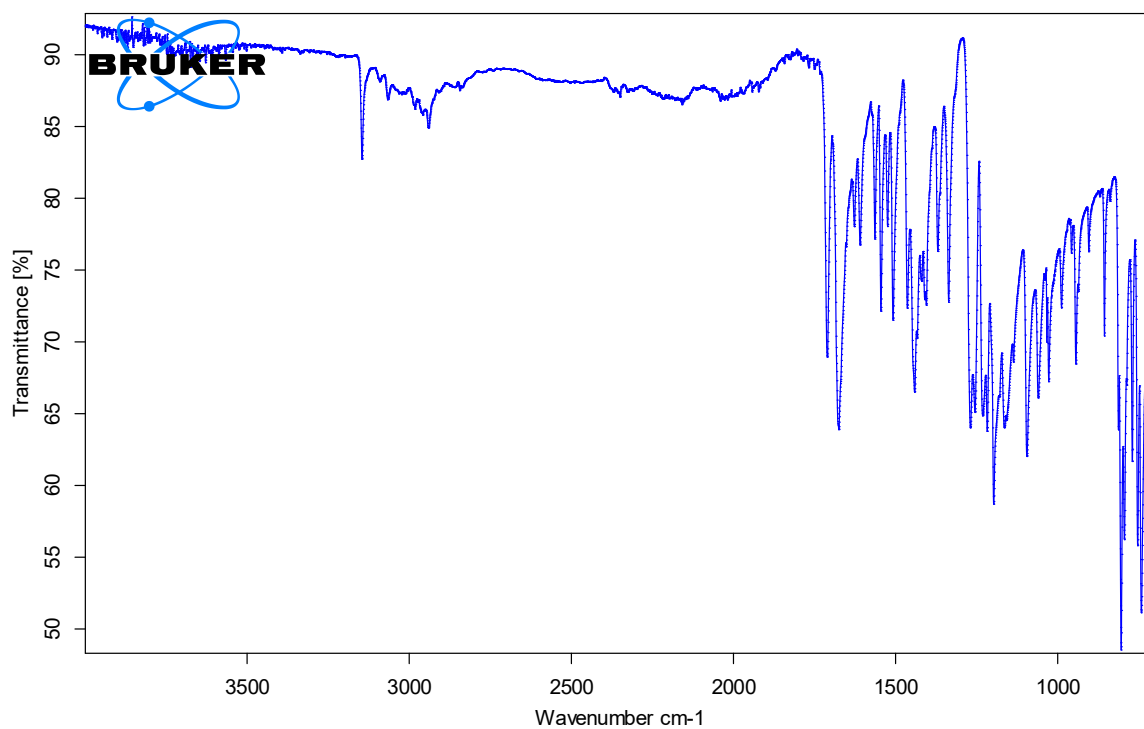

|                                                 |                    |                                    |            |
|-------------------------------------------------|--------------------|------------------------------------|------------|
| C:\OPUS_7.0.129\WORK\2021-07-14\2021-07-14-8C.1 | Sample description | Instrument type and / or accessory | 14/07/2021 |
|-------------------------------------------------|--------------------|------------------------------------|------------|

Page 1/1

Figure S14. IR spectrum of the compound 8c.

### 3. $^1\text{H}$ -NMR studies on compound **7a** at room temperature.

#### *NMR sample preparation:*

10 mg of dimethyl 3-acetylbenzo[f]pyrrolo[1,2-a]quinoline-1,2-dicarboxylate (**7a**) were dissolved in 1 mL  $\text{CDCl}_3$  and inserted in a 5 mm diameter NMR tube and sealed with a polypropylene cap. A  $^1\text{H}$ -NMR spectrum was quickly recorded than the sample was stored at room temperature. After 1 day, 2 days and 5 days respectively a new  $^1\text{H}$ -NMR spectrum was recorded for the sample.

The  $^1\text{H}$ -NMR spectra are presented in the S15 Fig

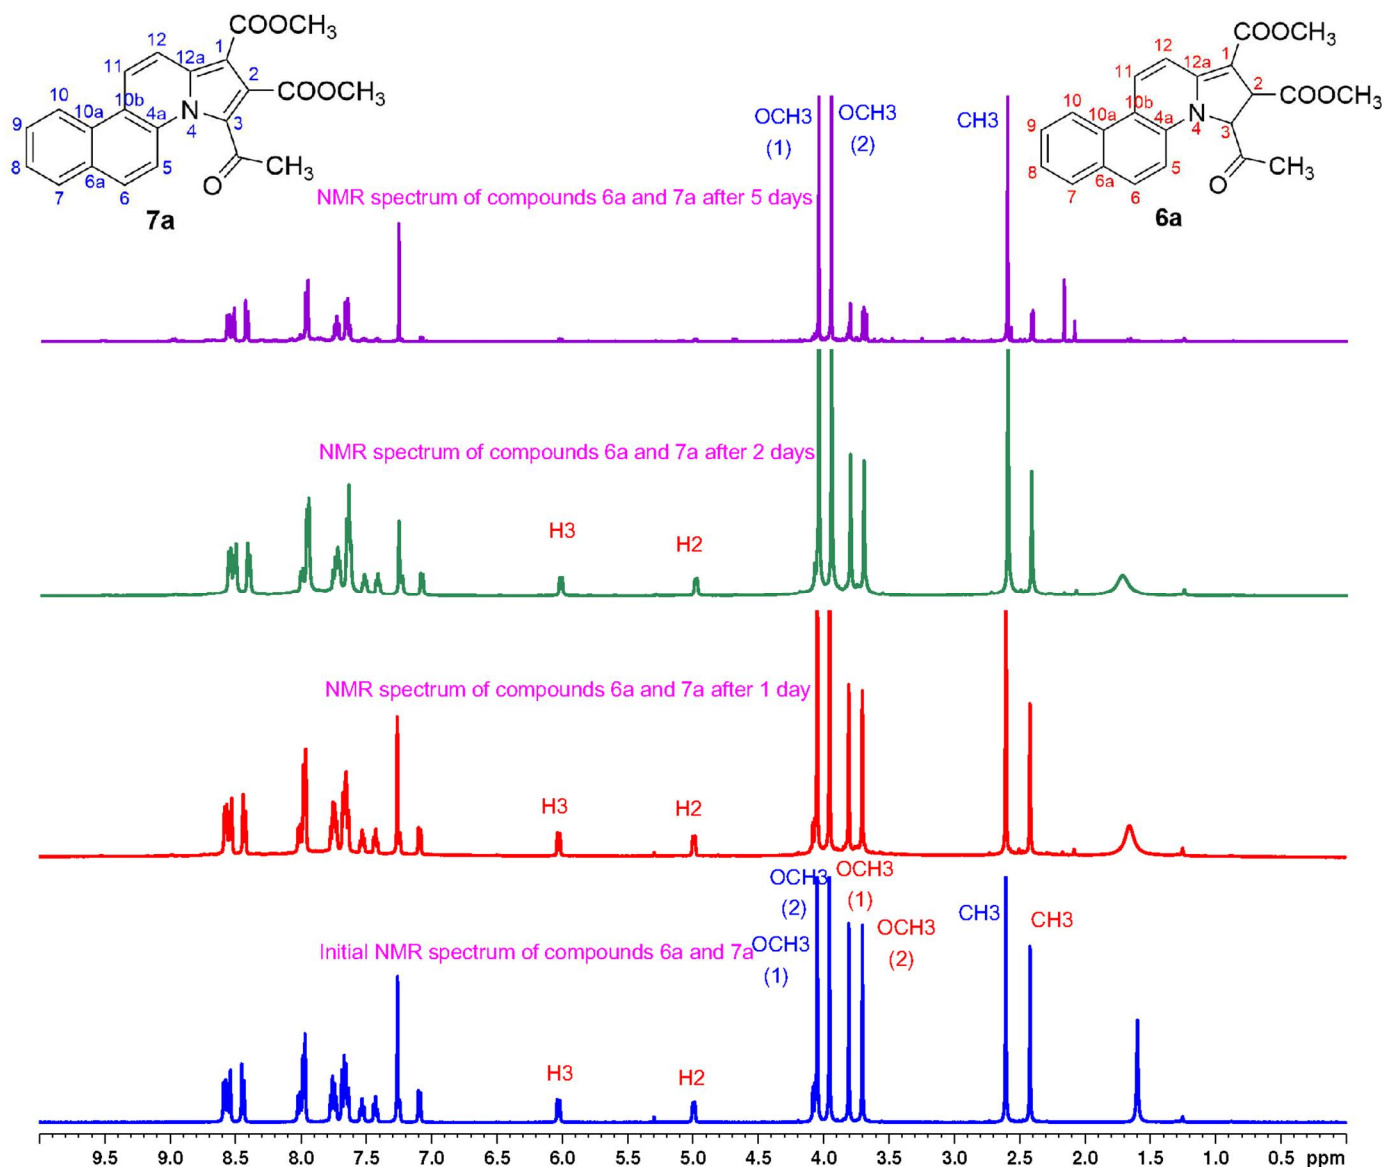

**Figure S15.** Time evolution of the  $^1\text{H}$ -NMR spectrum of dimethyl 3-acetylbenzo[f]pyrrolo[1,2-a]quinoline-1,2-dicarboxylate (**7a**).



#### 4. UV spectra of the obtained compounds

5a CHCl<sub>3</sub>.spc - RawData  
5a CY.spc - RawData

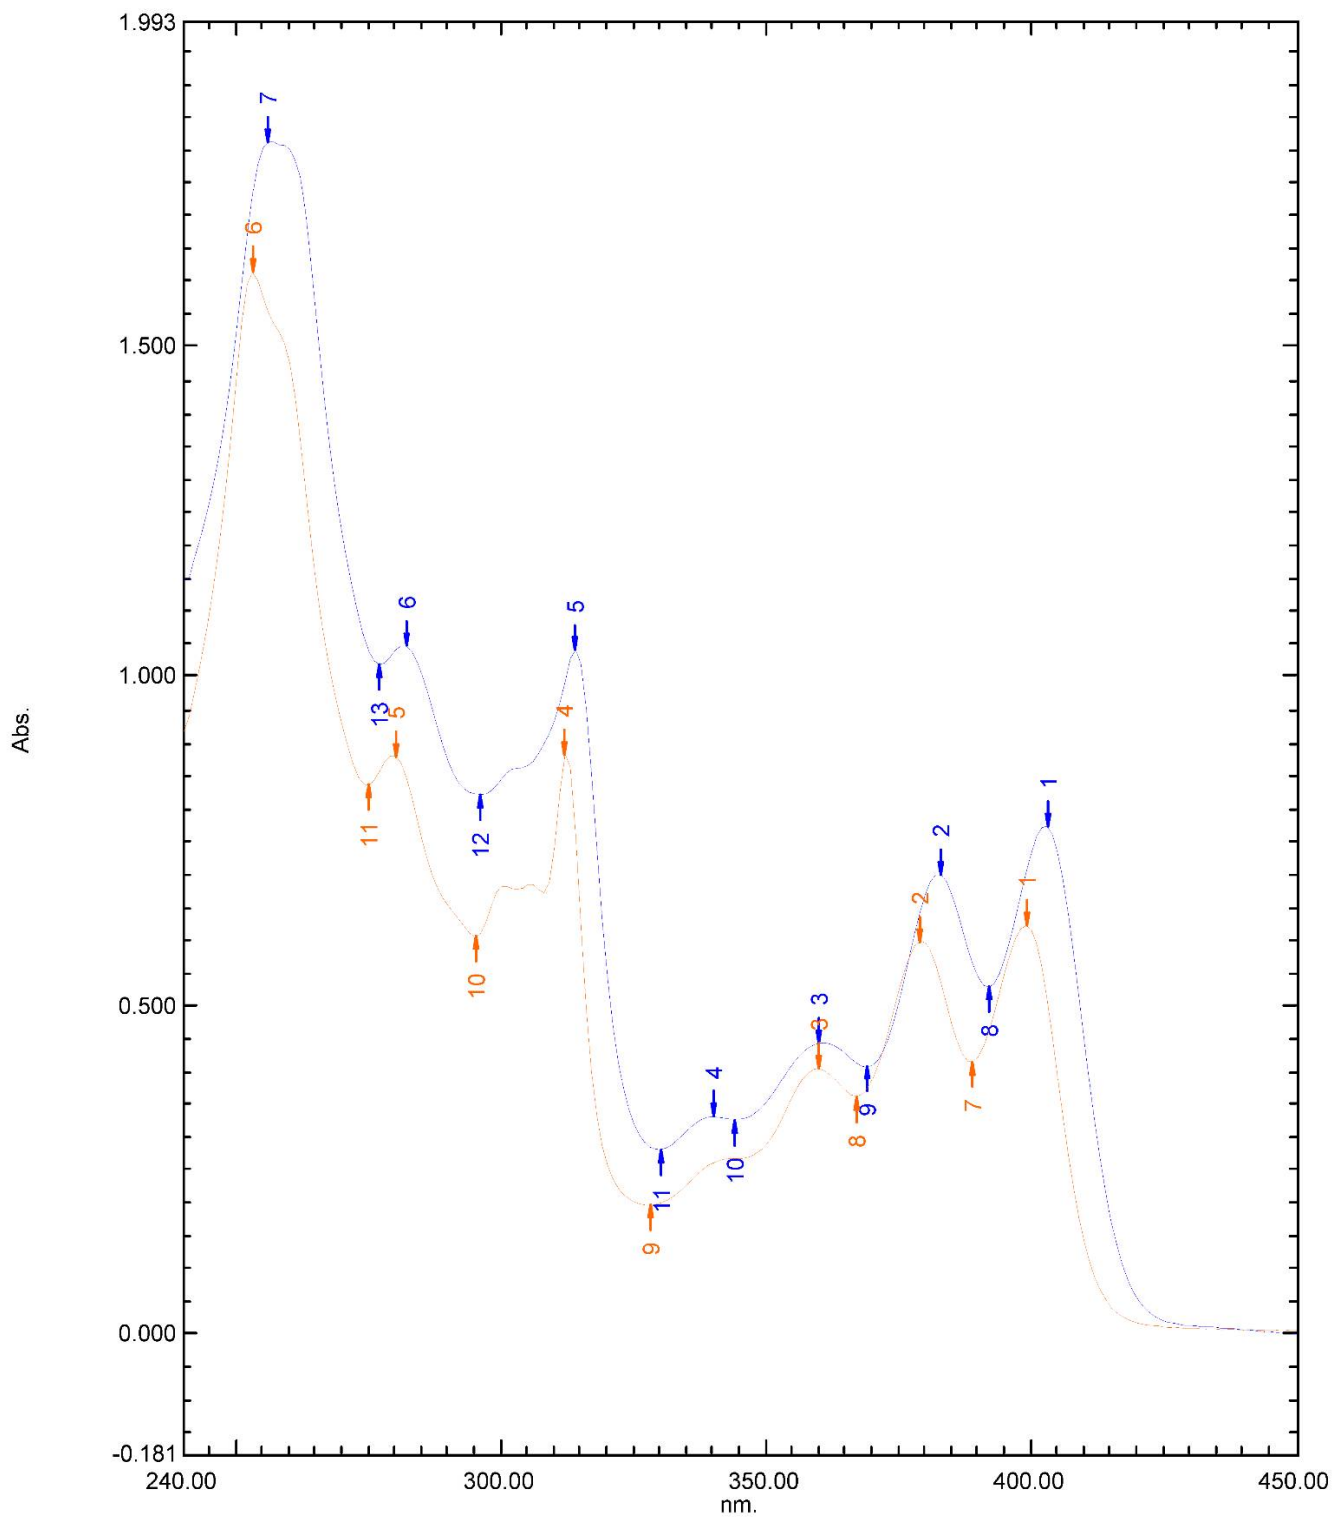

Figure S16. Overlaid UV-Vis spectra of the compound 5a in trichloromethane and cyclohexane.

5b CHCl3.spc - RawData  
5b CY.spc - RawData

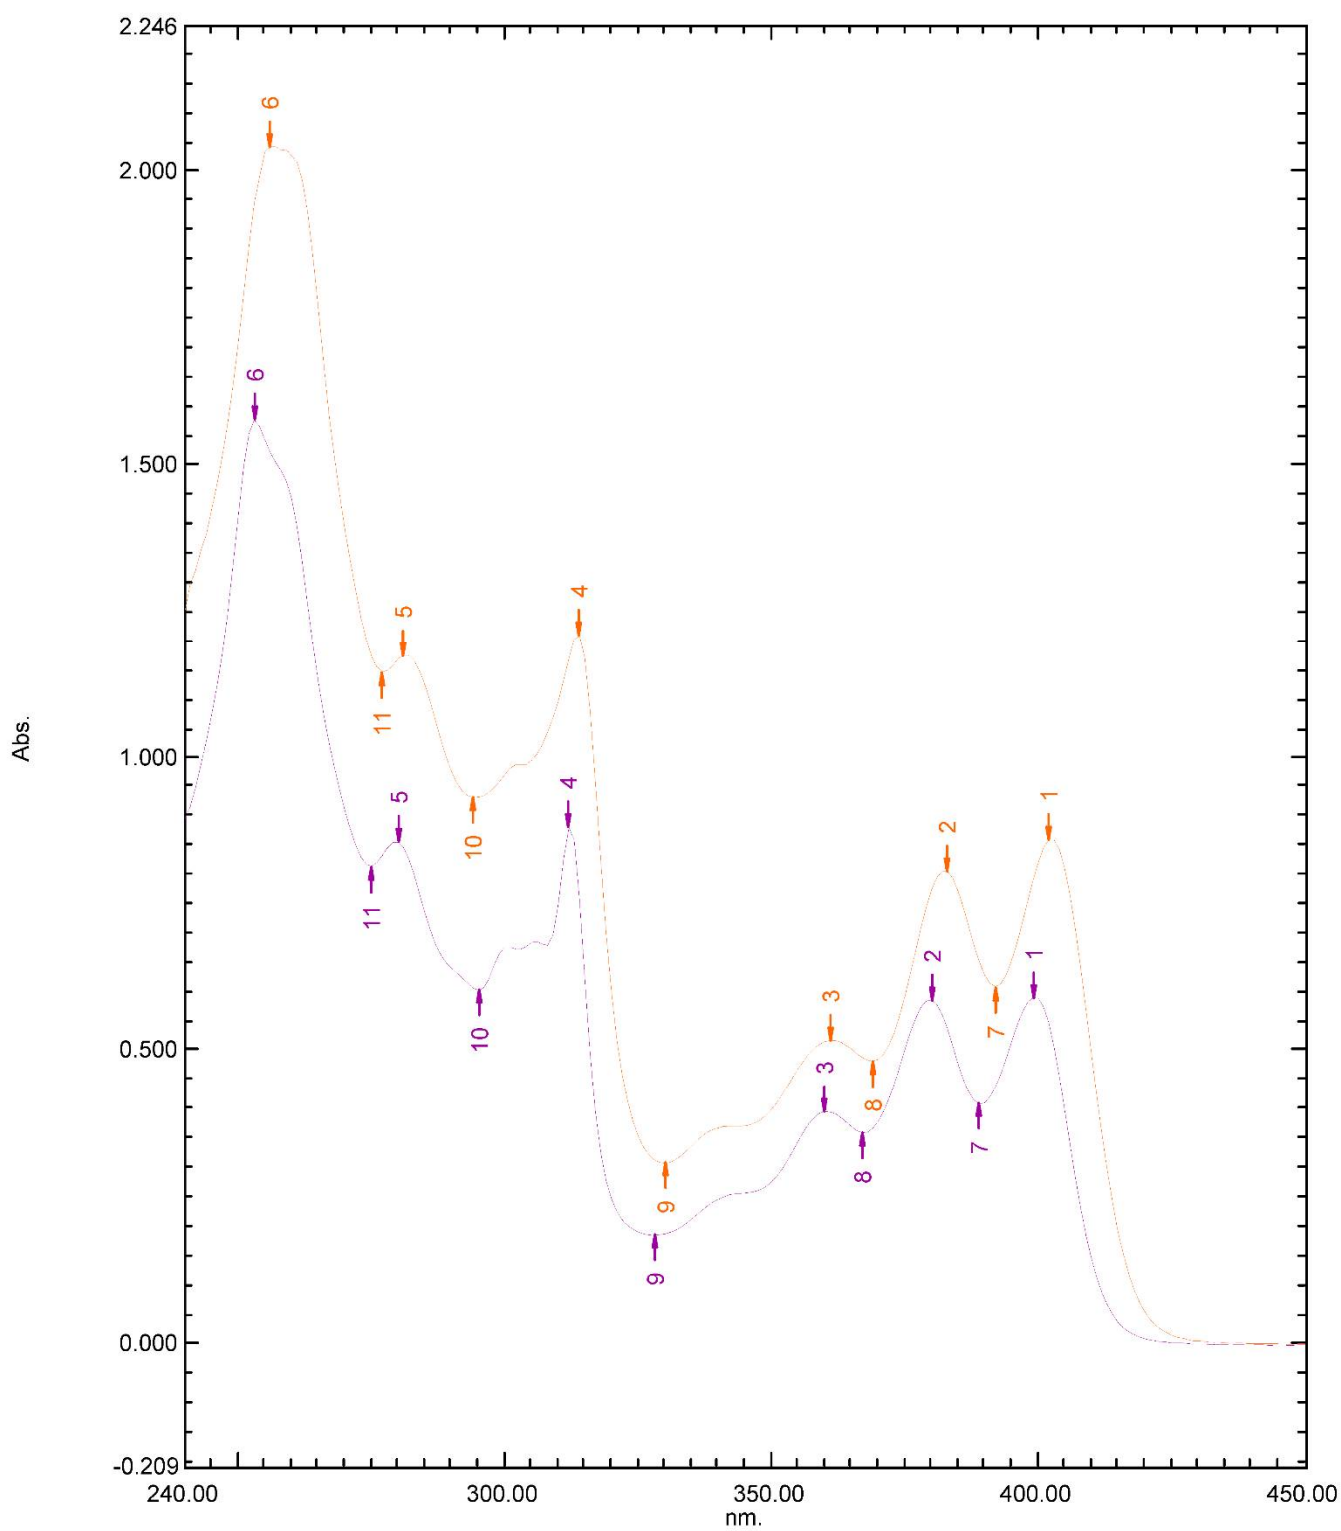

**Figure S17.** Overlaid UV-Vis spectra of the compound **5b** in trichloromethane and cyclohexane.

5c CHCl3d.spc - RawData  
5c CY.spc - RawData

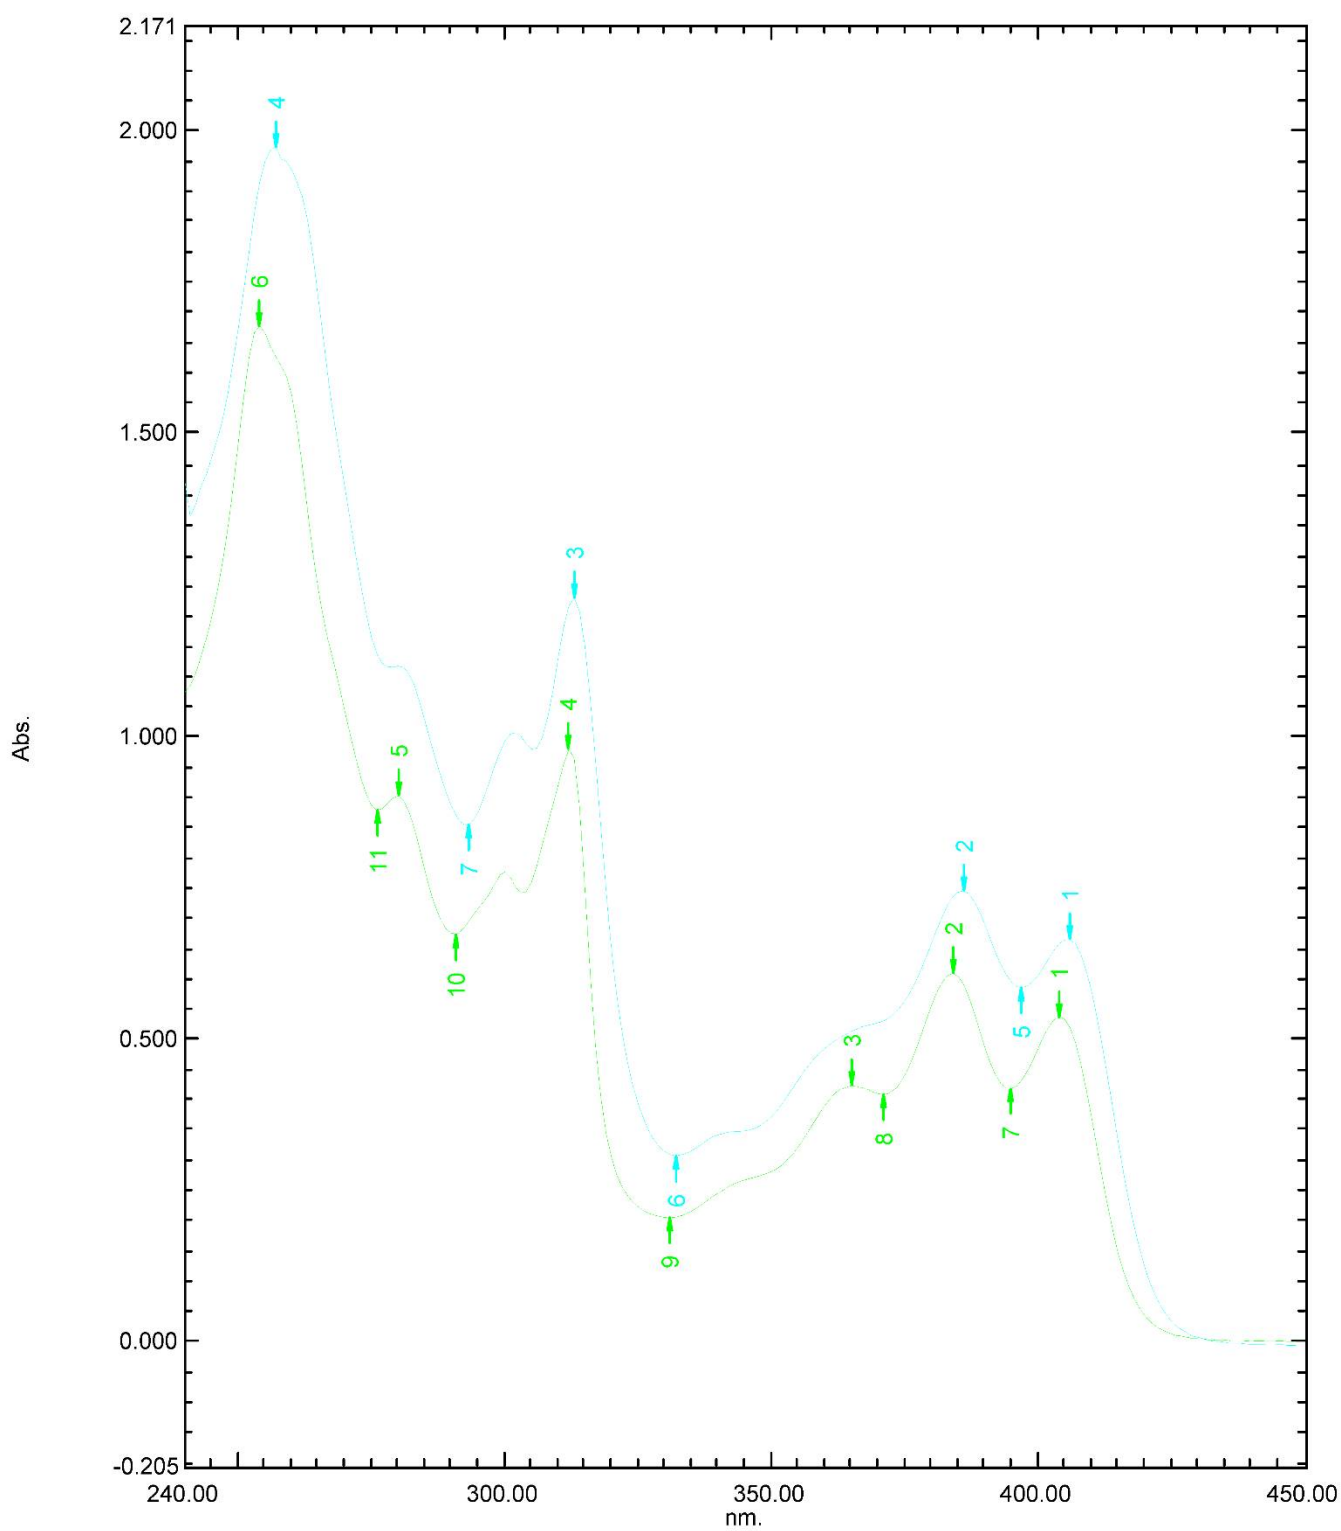

Figure S18. Overlaid UV-Vis spectra of the compound **5c** in trichloromethane and cyclohexane.

7a CHCl3.spc - RawData  
7a CY.spc - RawData

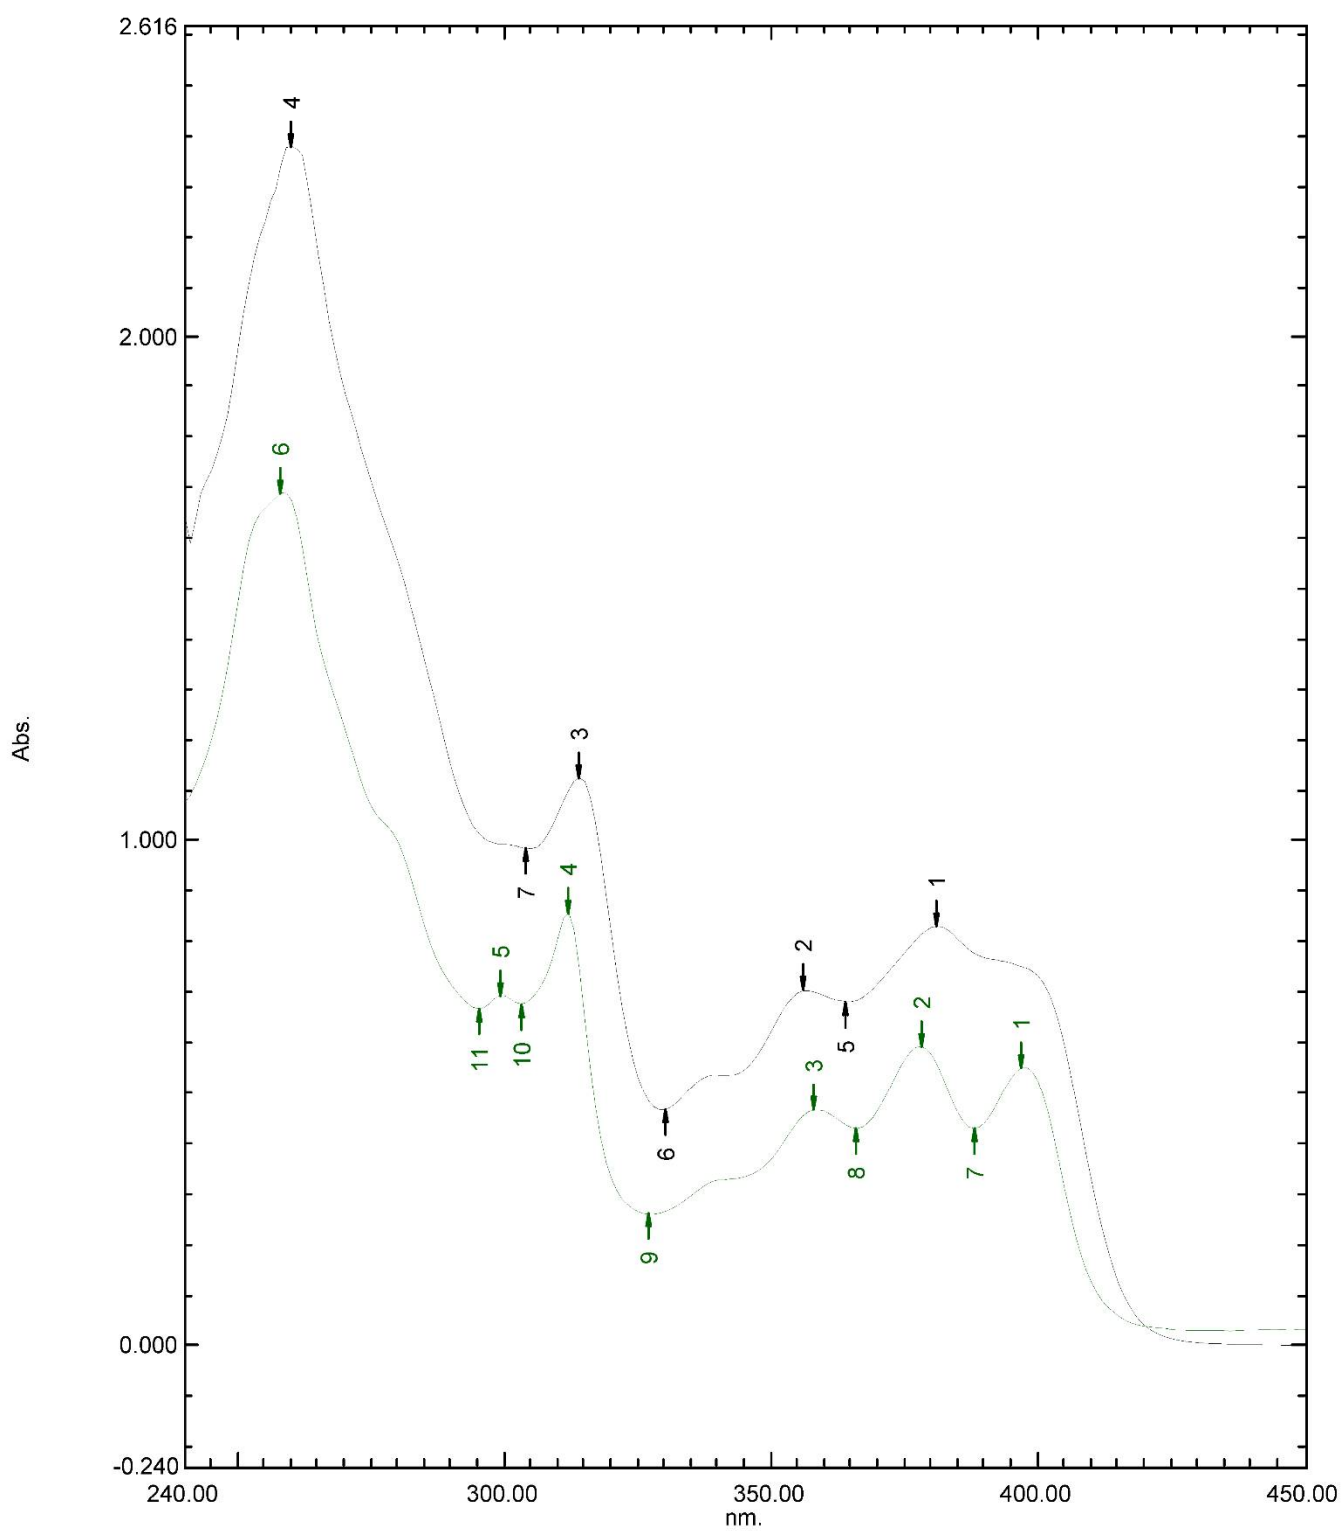

Figure S19. Overlaid UV-Vis spectra of the compound **7a** in trichloromethane and cyclohexane.

7b CHCl3.spc - RawData  
7b CY.spc - RawData

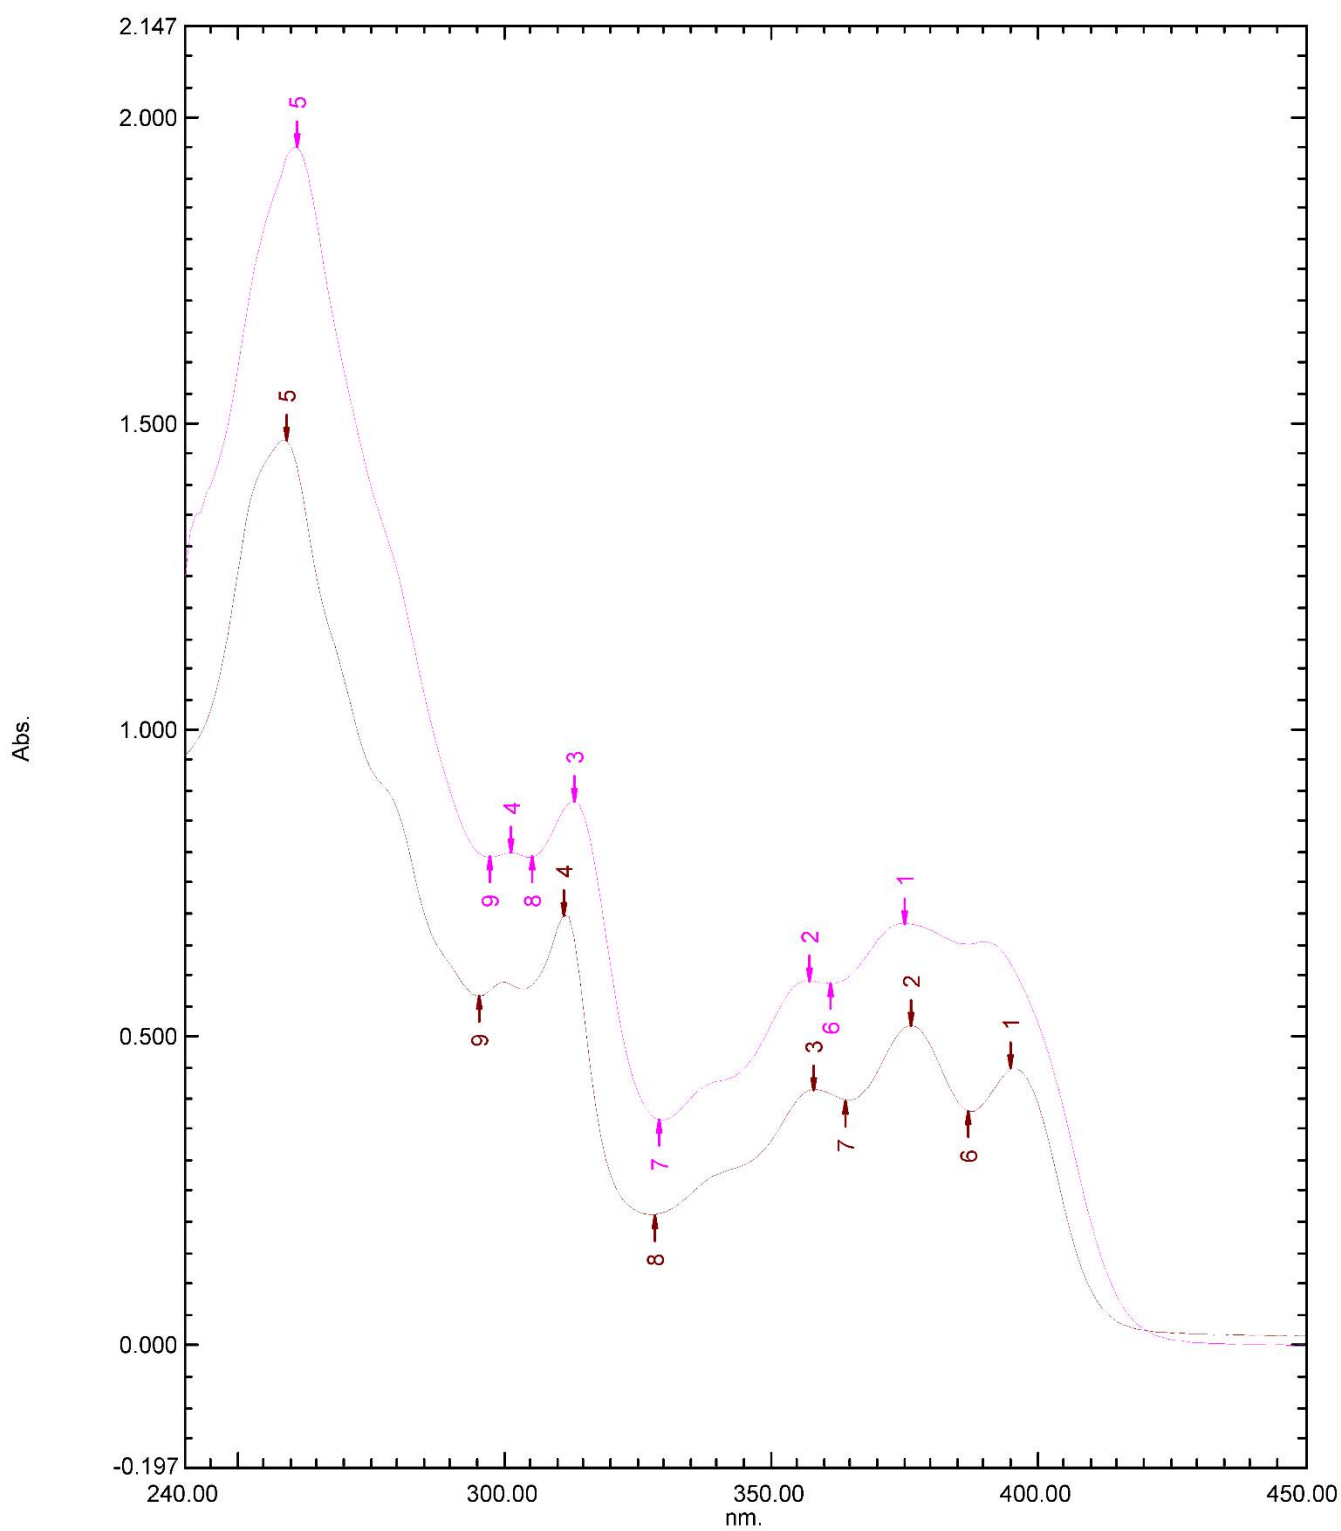

**Figure S20.** Overlaid UV-Vis spectra of the compound **7b** in trichloromethane and cyclohexane.

7c CHCl3.spc - RawData  
7c CY.spc - RawData

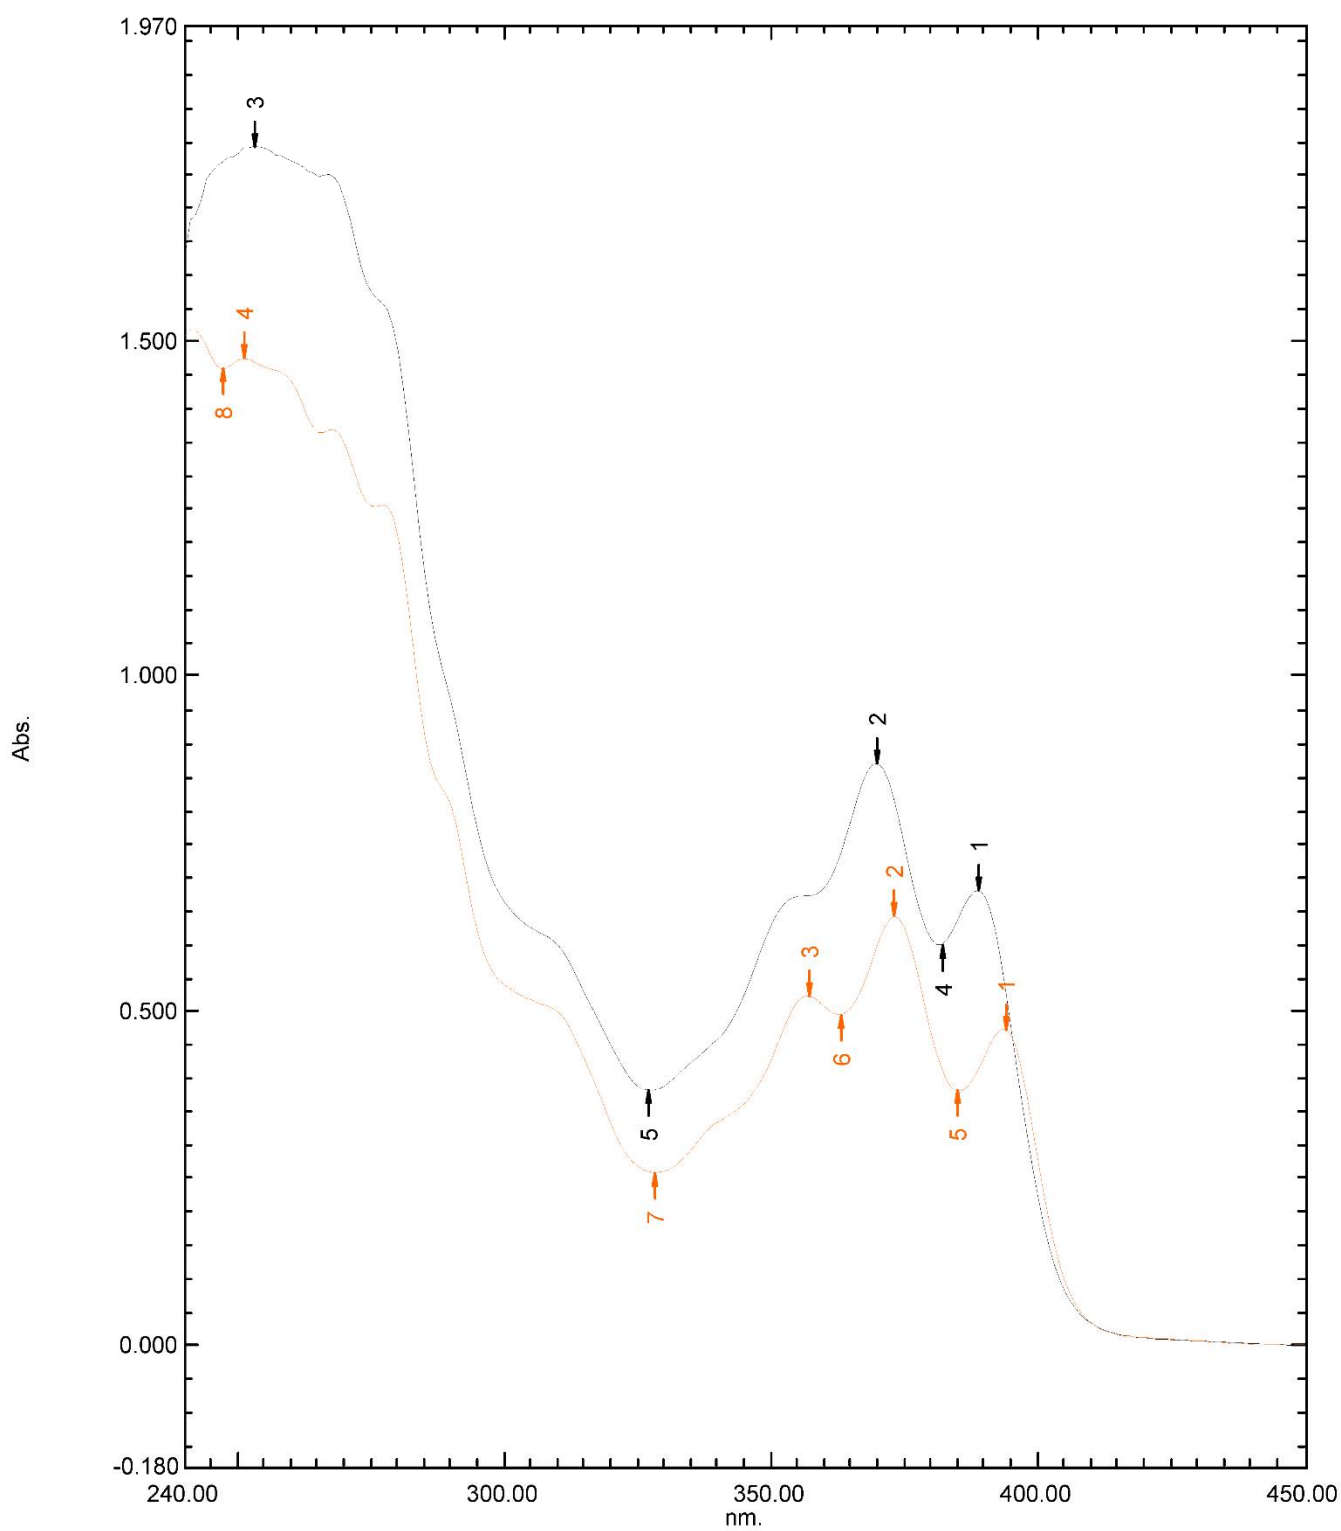

**Figure S21.** Overlaid UV-Vis spectra of the compound **7c** in trichloromethane and cyclohexane.

8c CHCl3.spc - RawData  
8c CY.spc - RawData

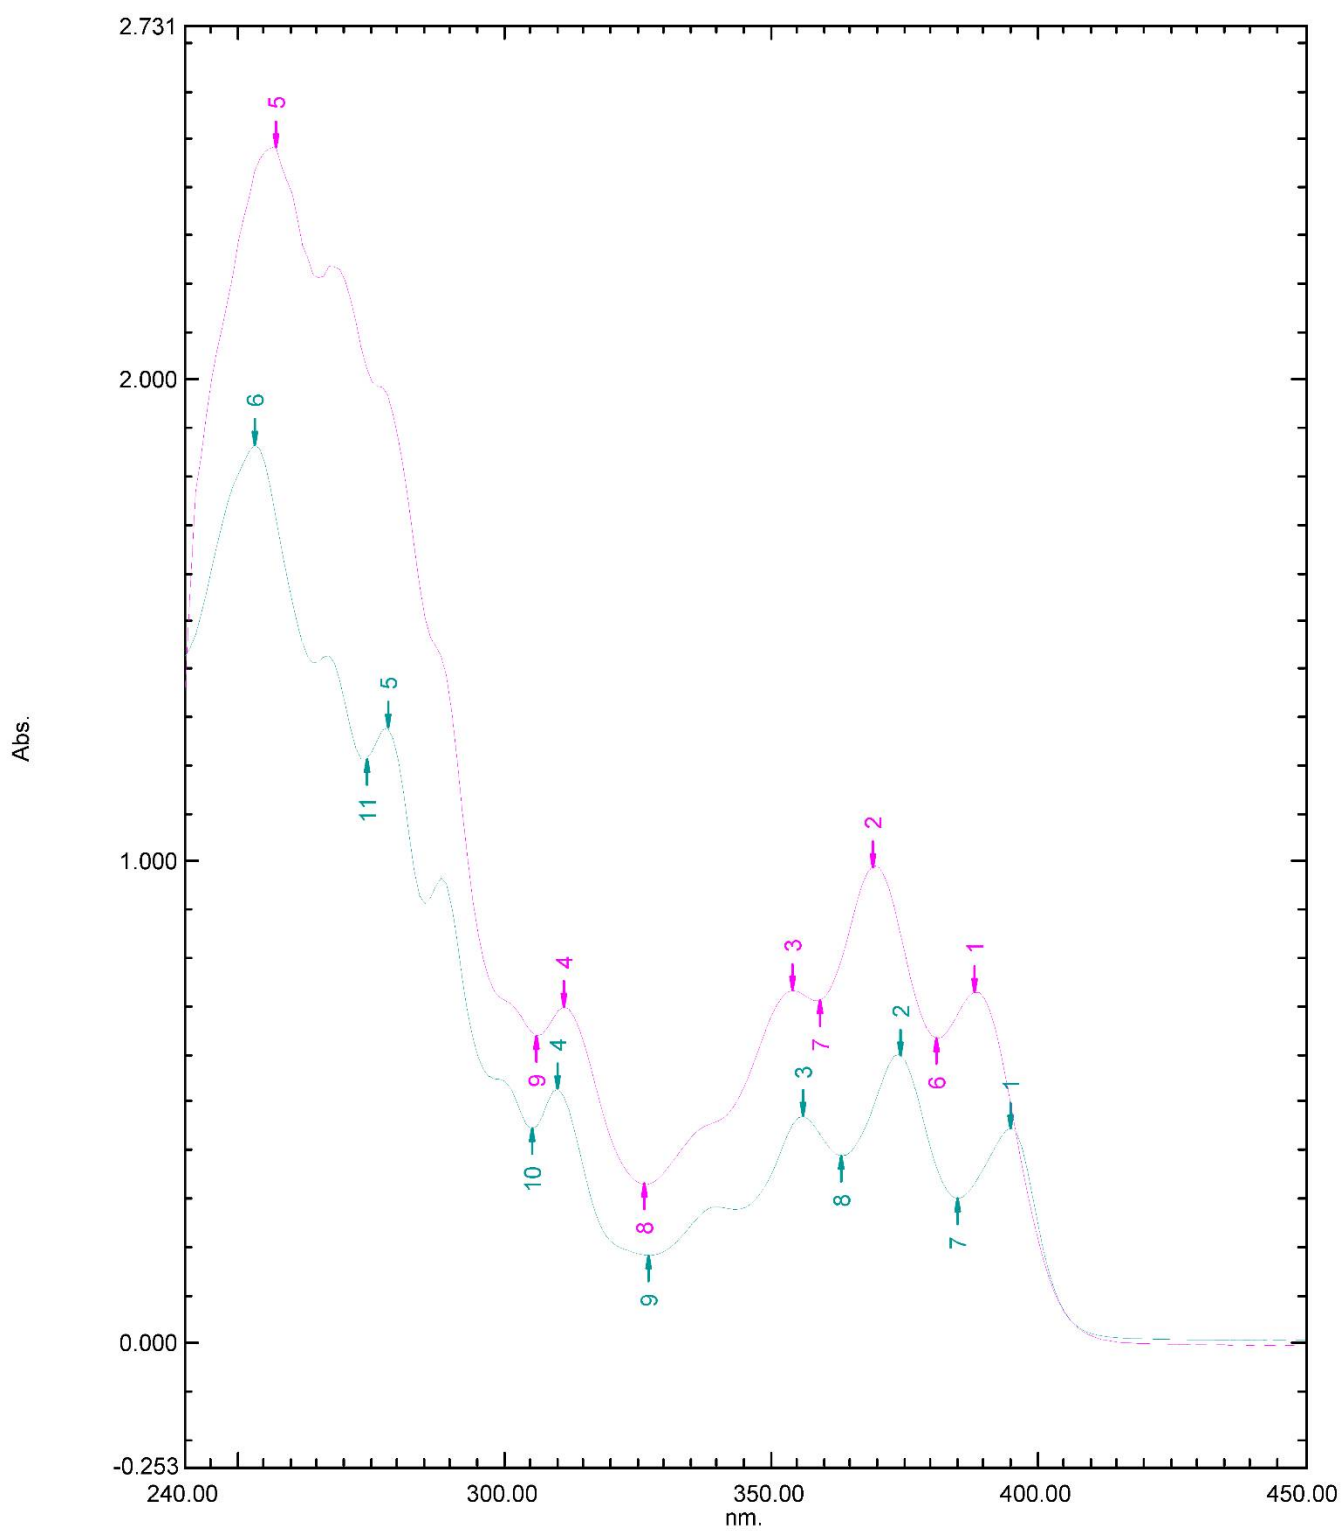

Figure S22. Overlaid UV-Vis spectra of the compound **8c** in trichloromethane and cyclohexane.

## 5. Emission spectra of the obtained compounds

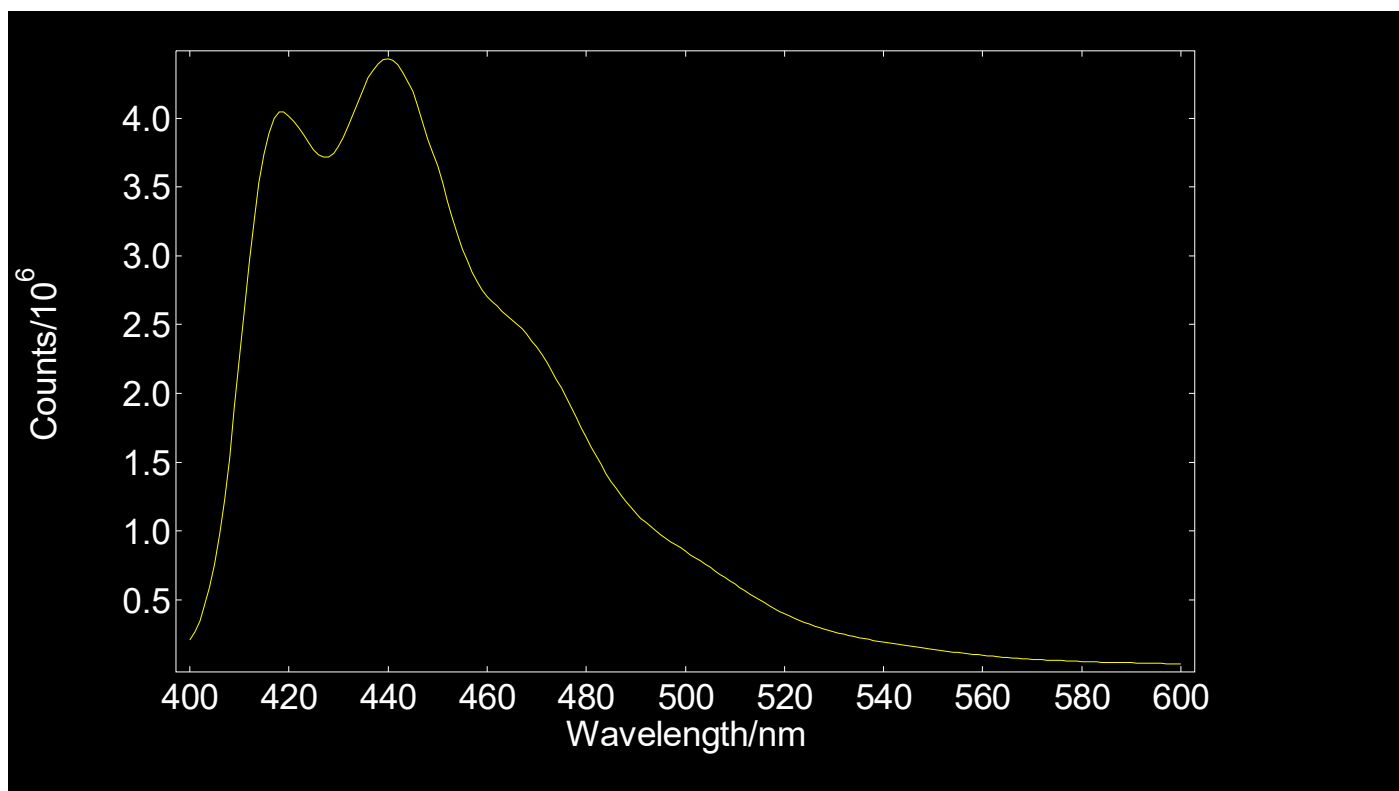

Figure S23. Emission spectrum of the compound **5a** in trichloromethane.

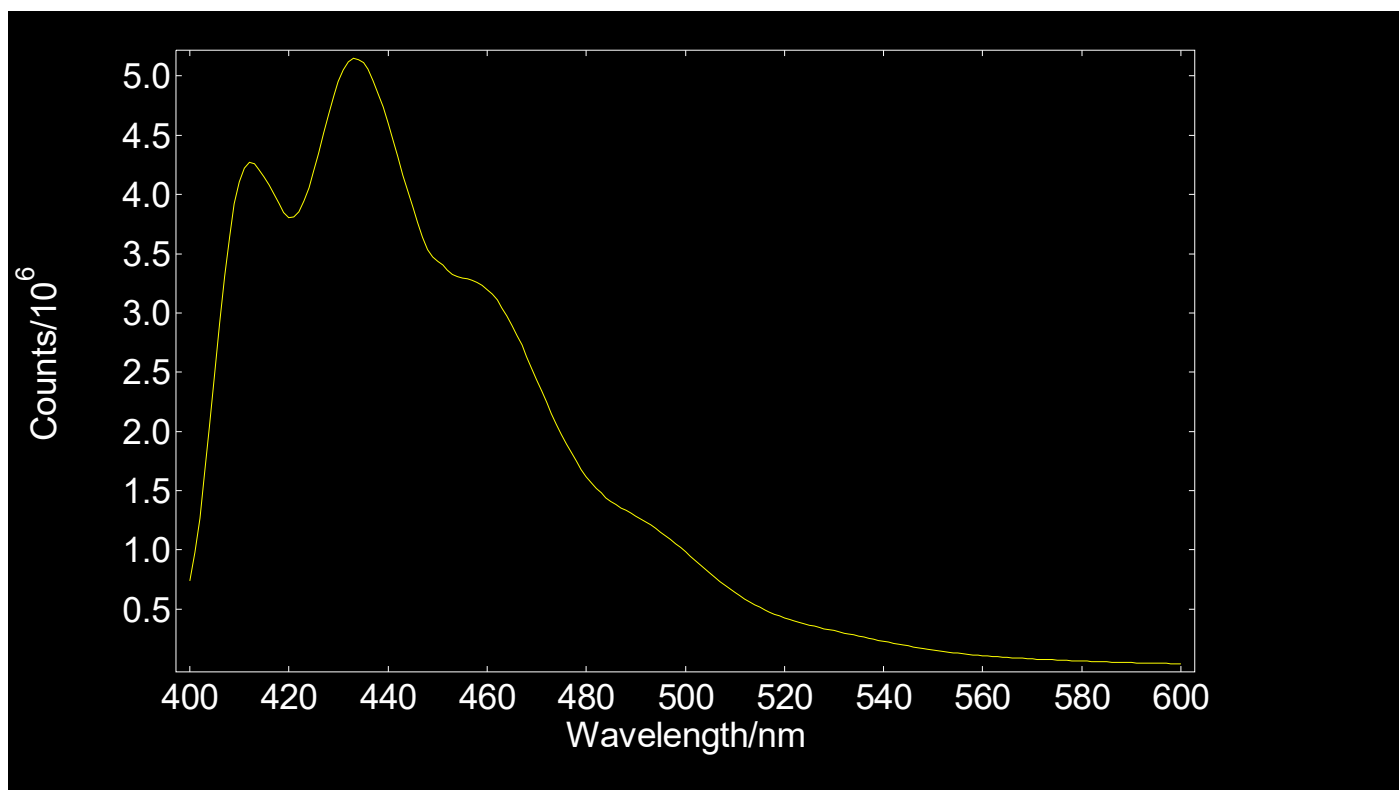

Figure S24. Emission spectrum of the compound **5a** in cyclohexane.



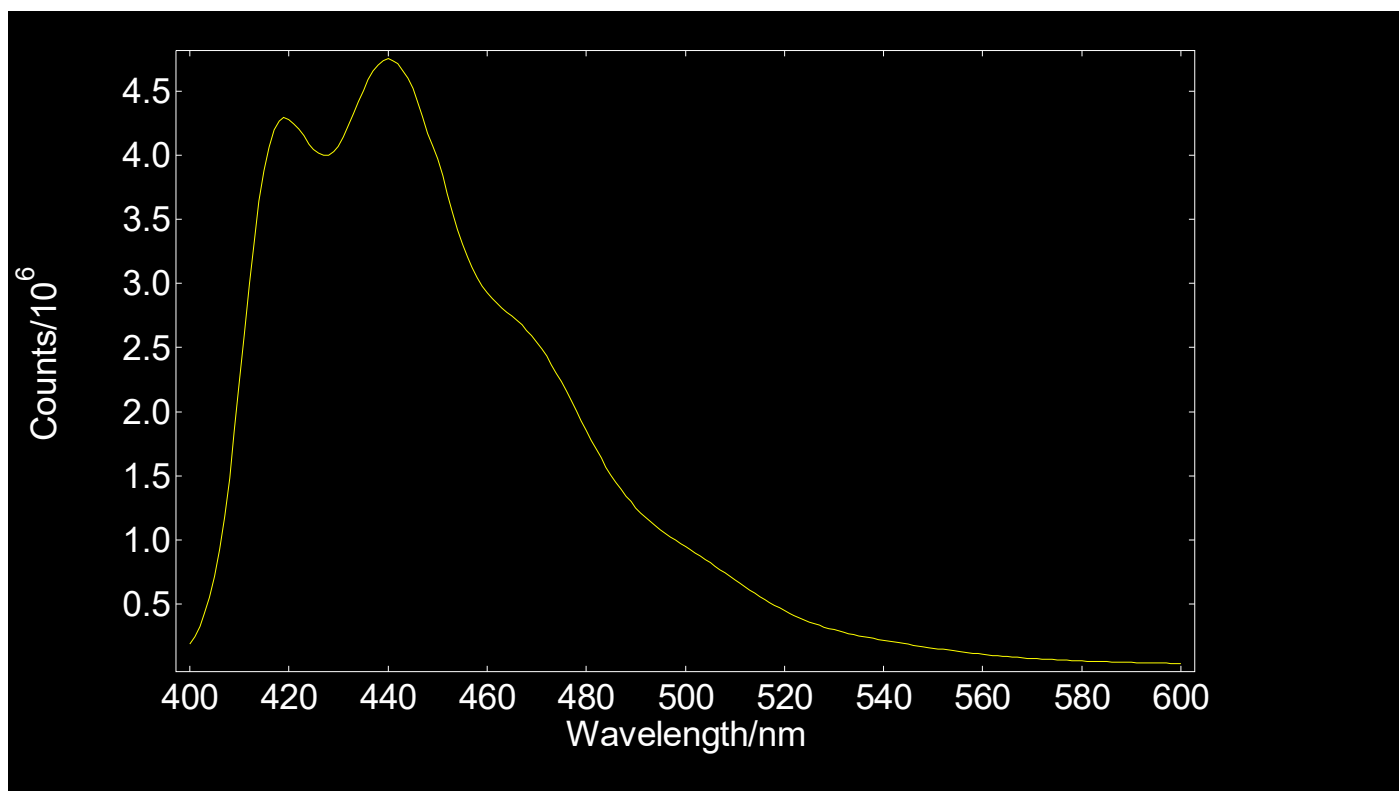

Figure S25. Overlaid UV-Vis spectra of the compound **5b** in trichloromethane and cyclohexane.

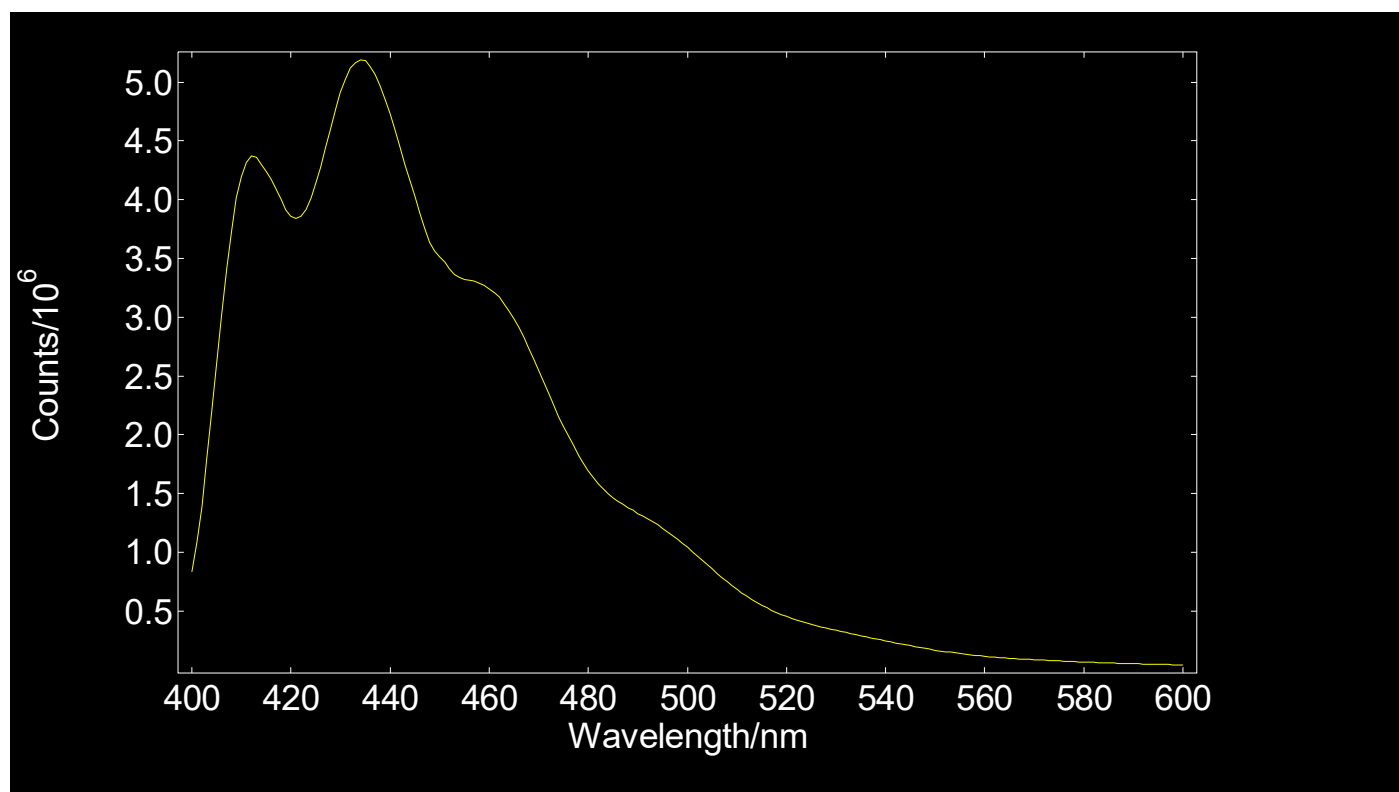

Figure S26. Emission spectrum of the compound **5b** in cyclohexane.

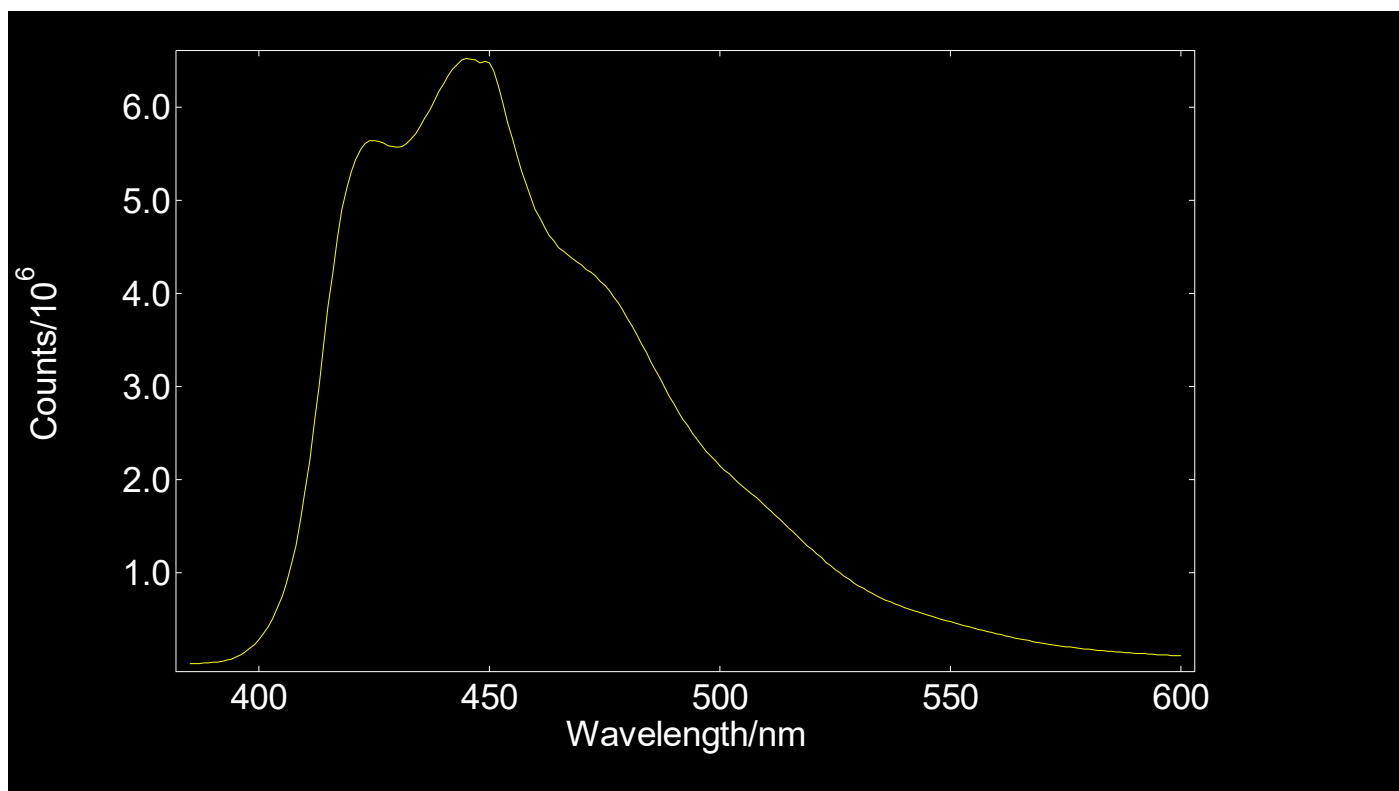

**Figure S27.** Emission spectrum of the compound **5c** in trichloromethane.

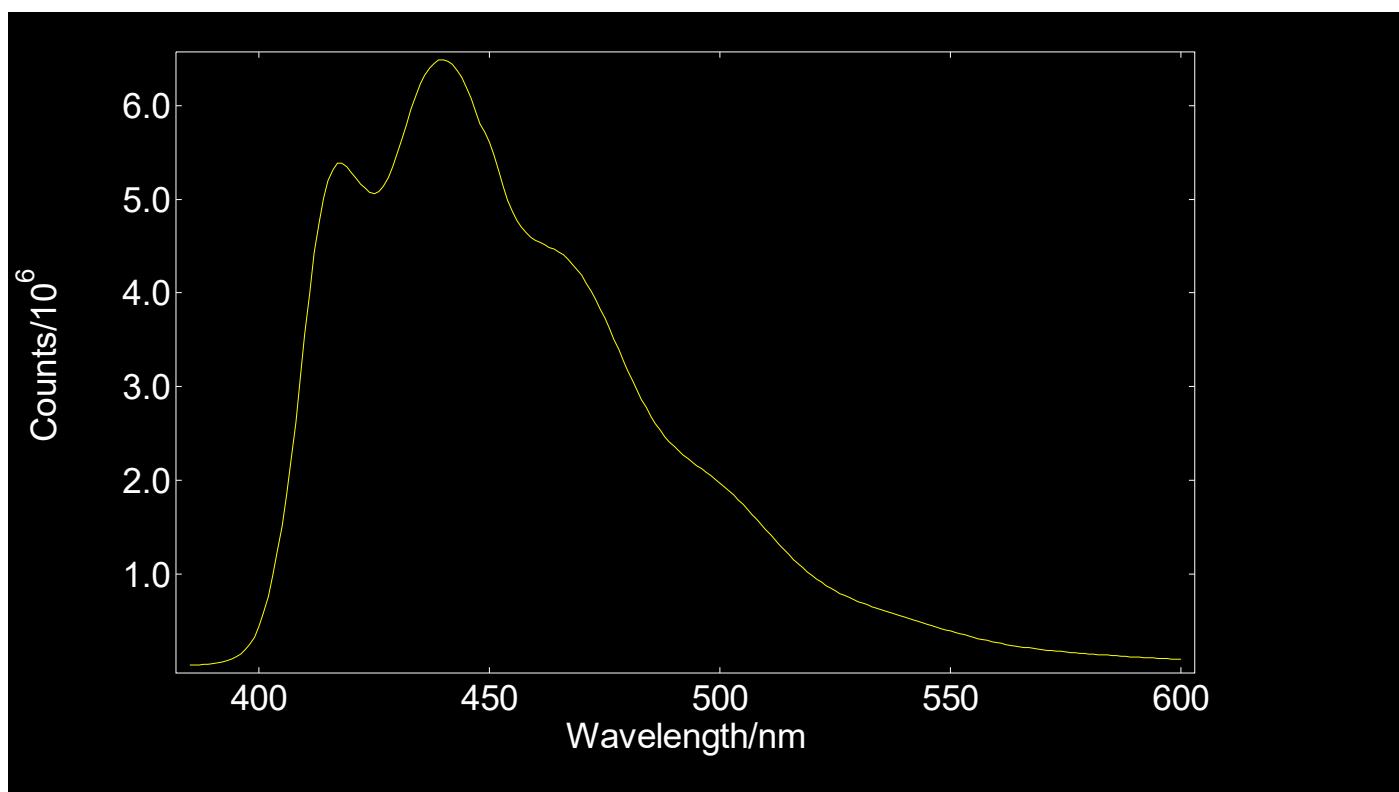

**Figure S28.** Emission spectrum of the compound **5c** in cyclohexane.

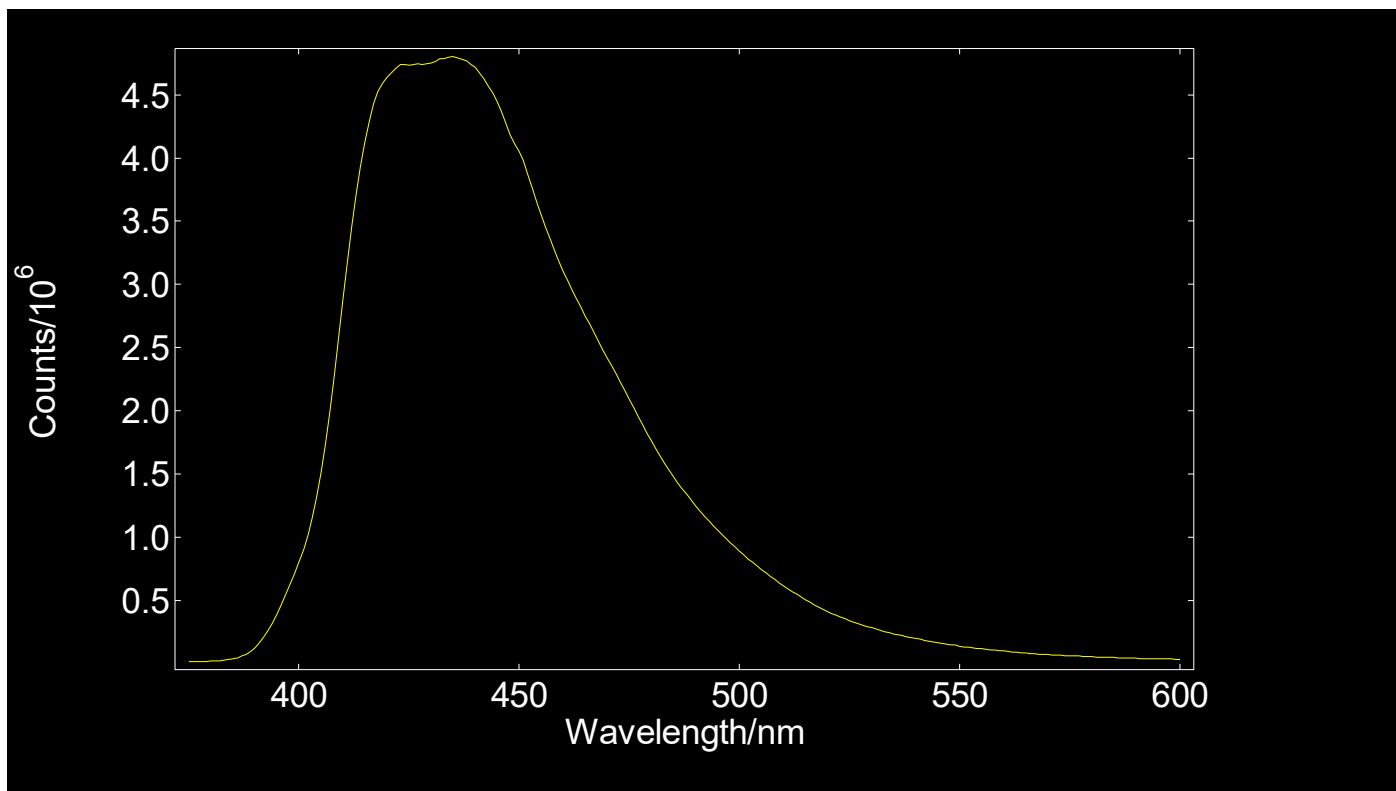

**Figure S29.** Emission spectrum of the compound **7a** in trichloromethane.

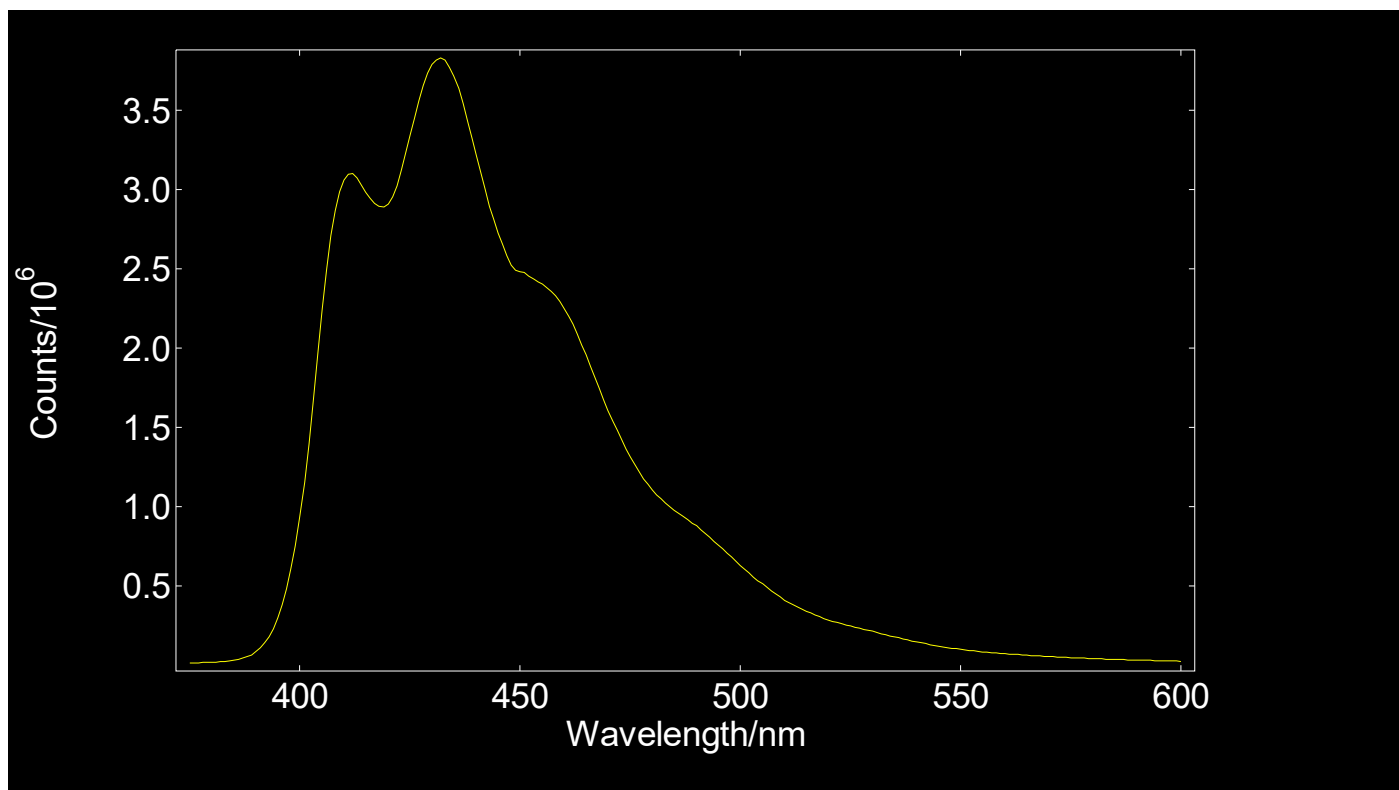

**Figure S30.** Emission spectrum of the compound **7a** in cyclohexane.

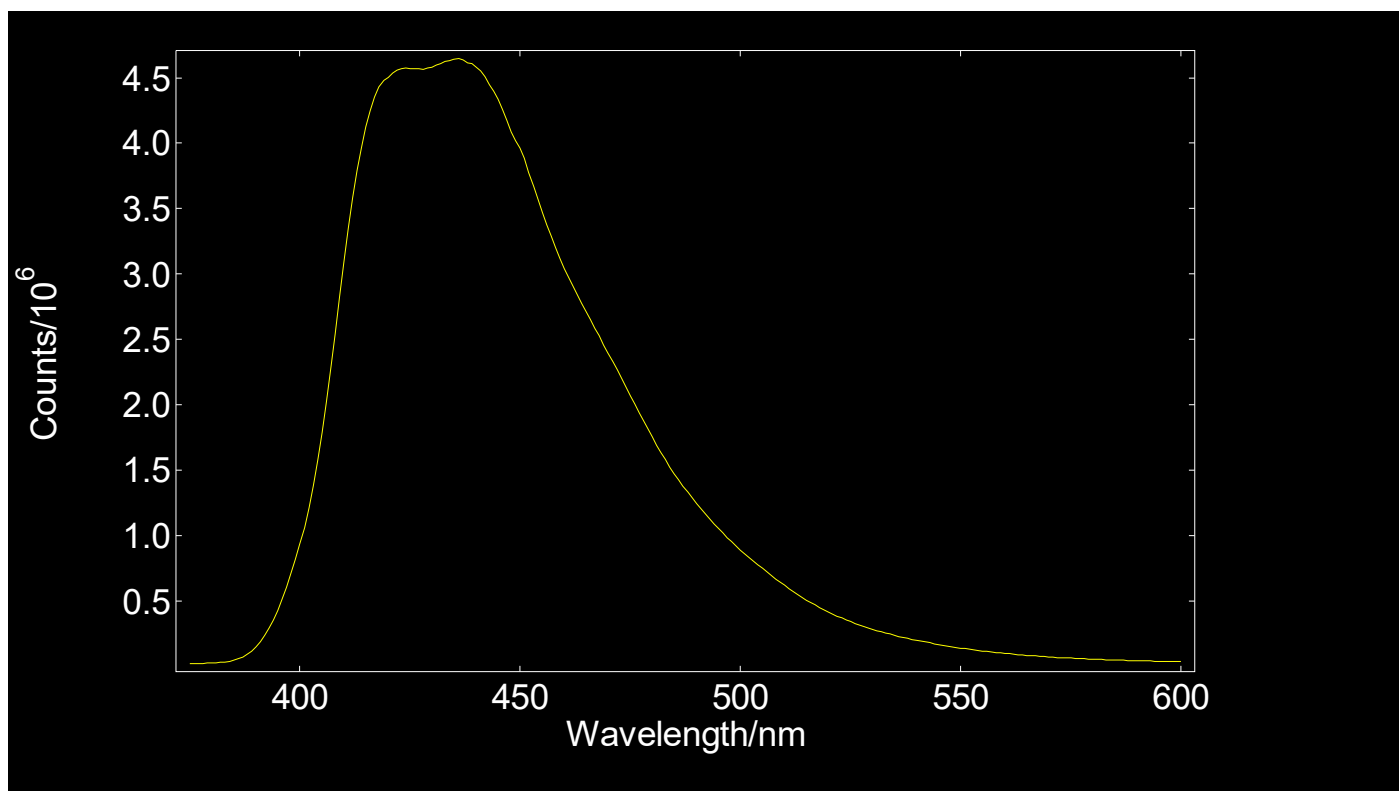

**Figure S31.** Emission spectrum of the compound **7b** in trichloromethane.

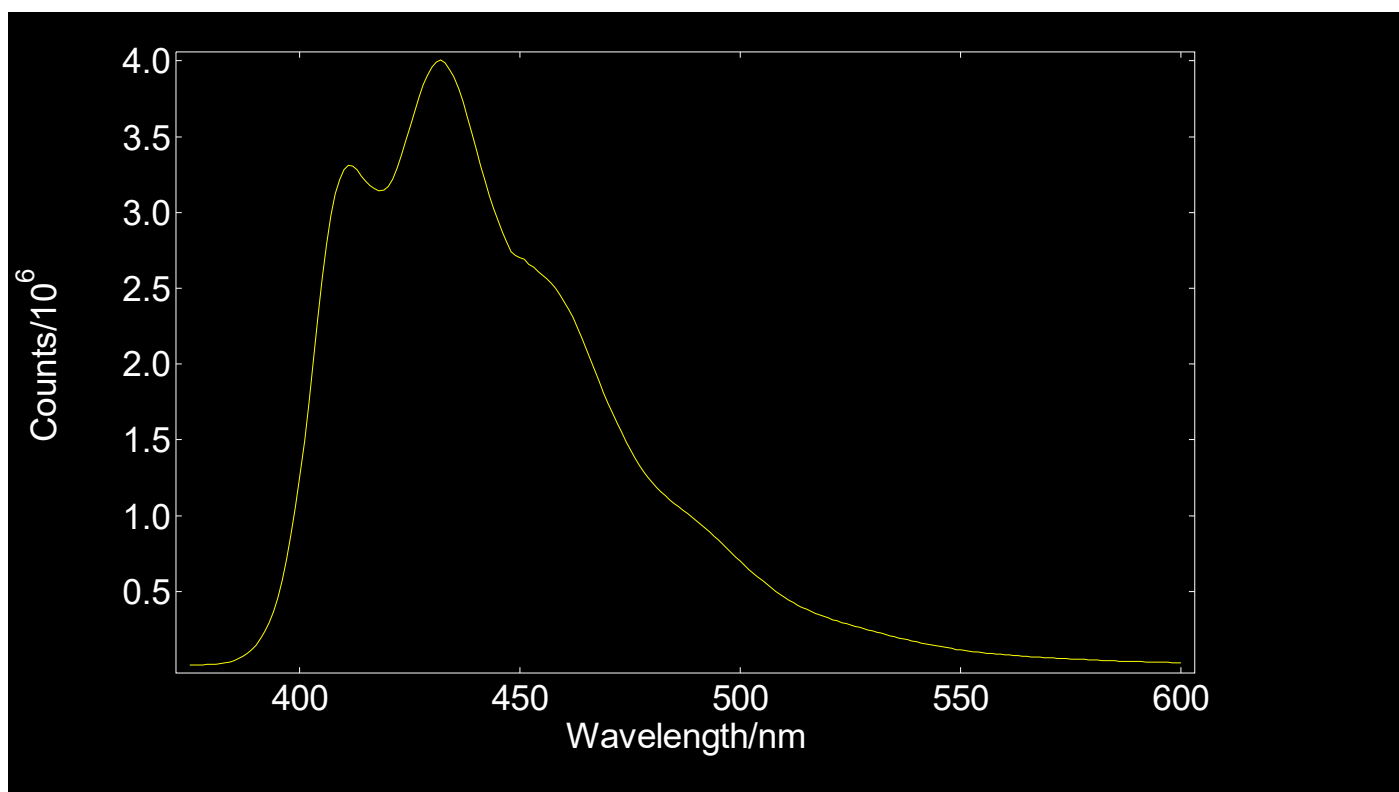

**Figure S32.** Emission spectrum of the compound **7b** in cyclohexane.

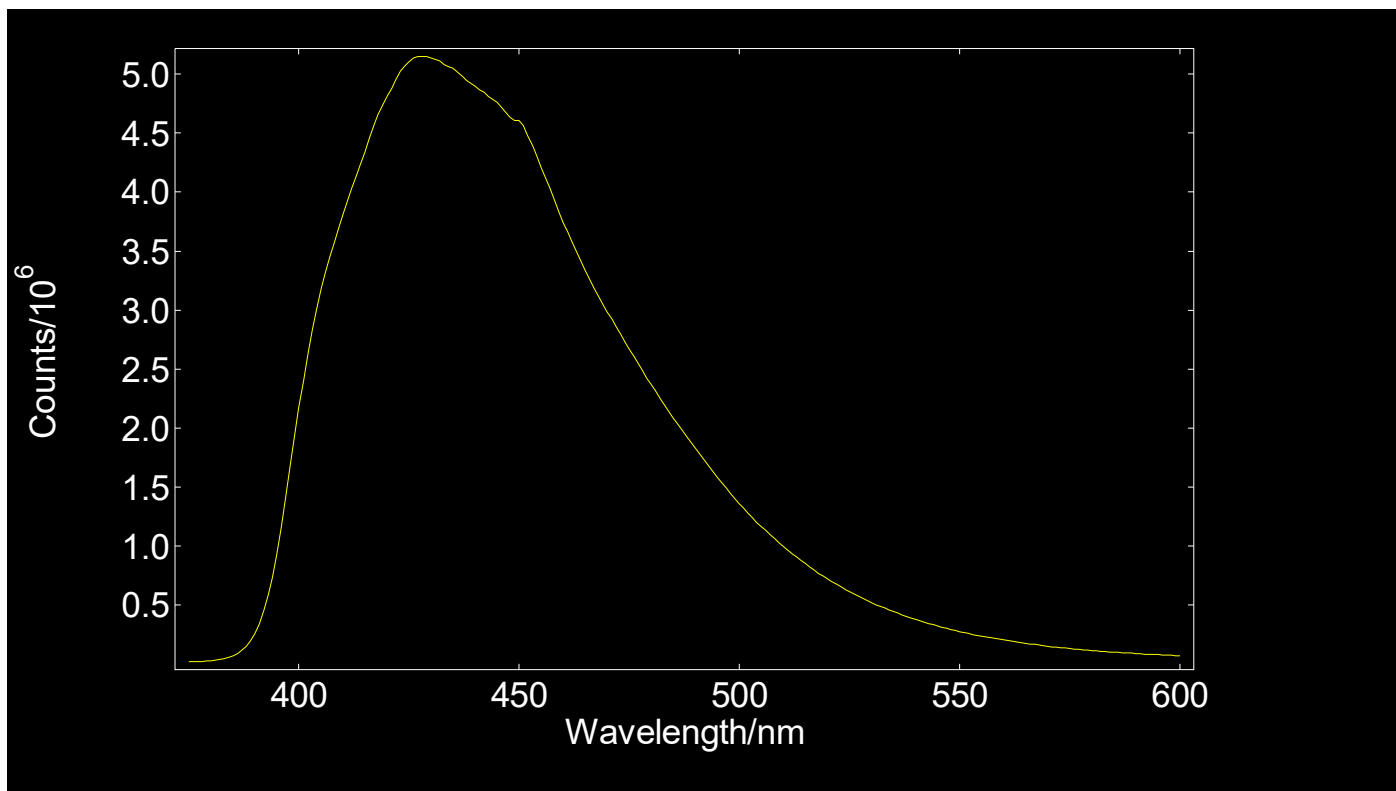

**Figure S33.** Emission spectrum of the compound **7c** in trichloromethane.

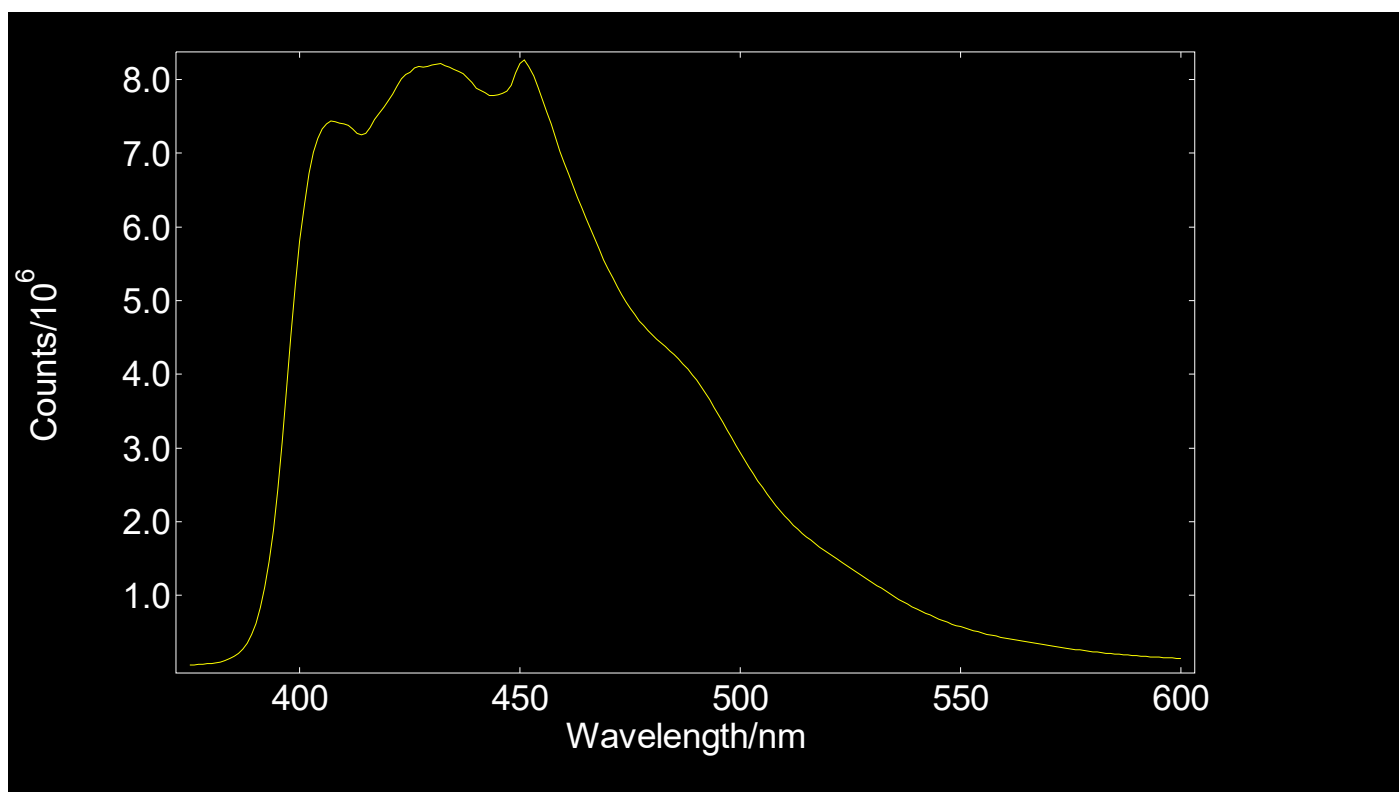

**Figure S34.** Emission spectrum of the compound **7c** in cyclohexane.

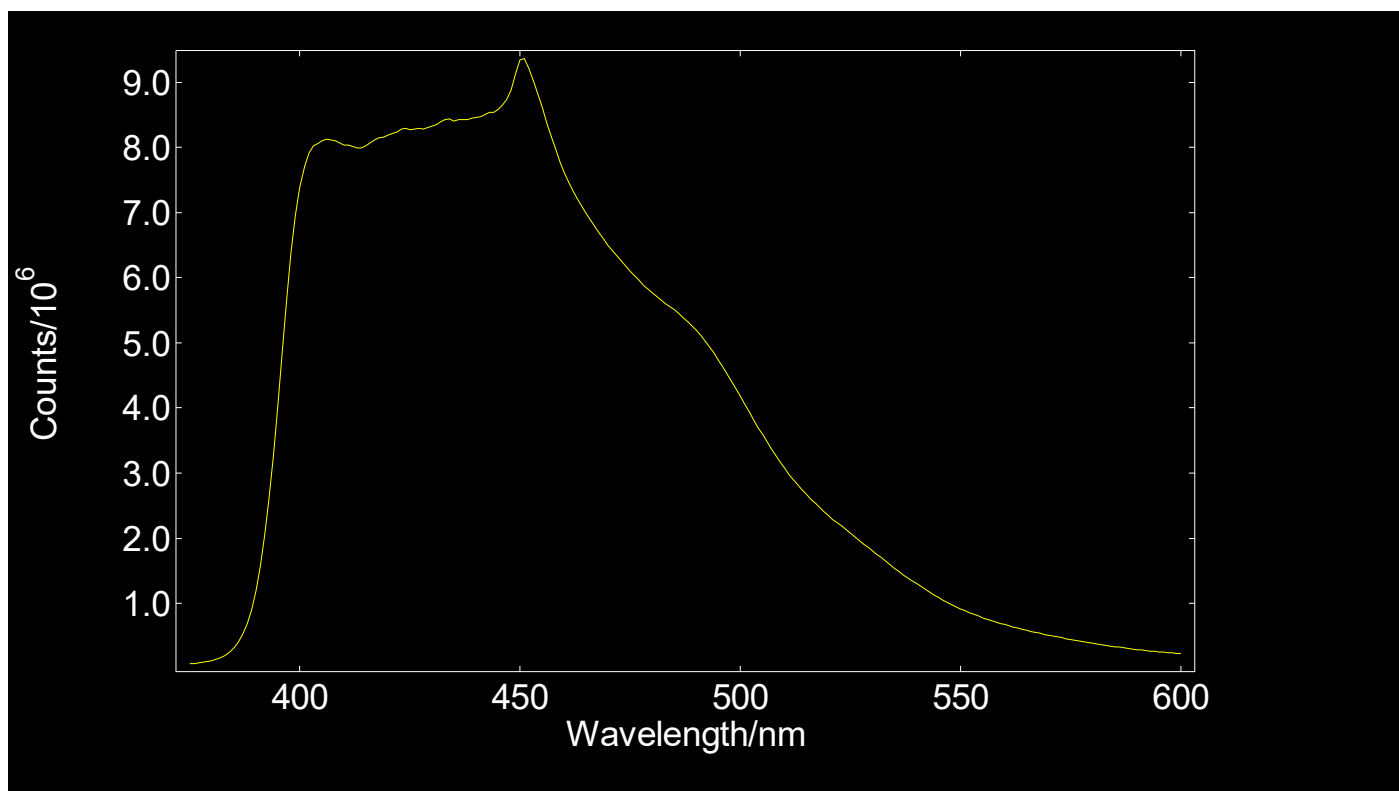

**Figure S35.** Emission spectrum of the compound **8c** in trichloromethane.

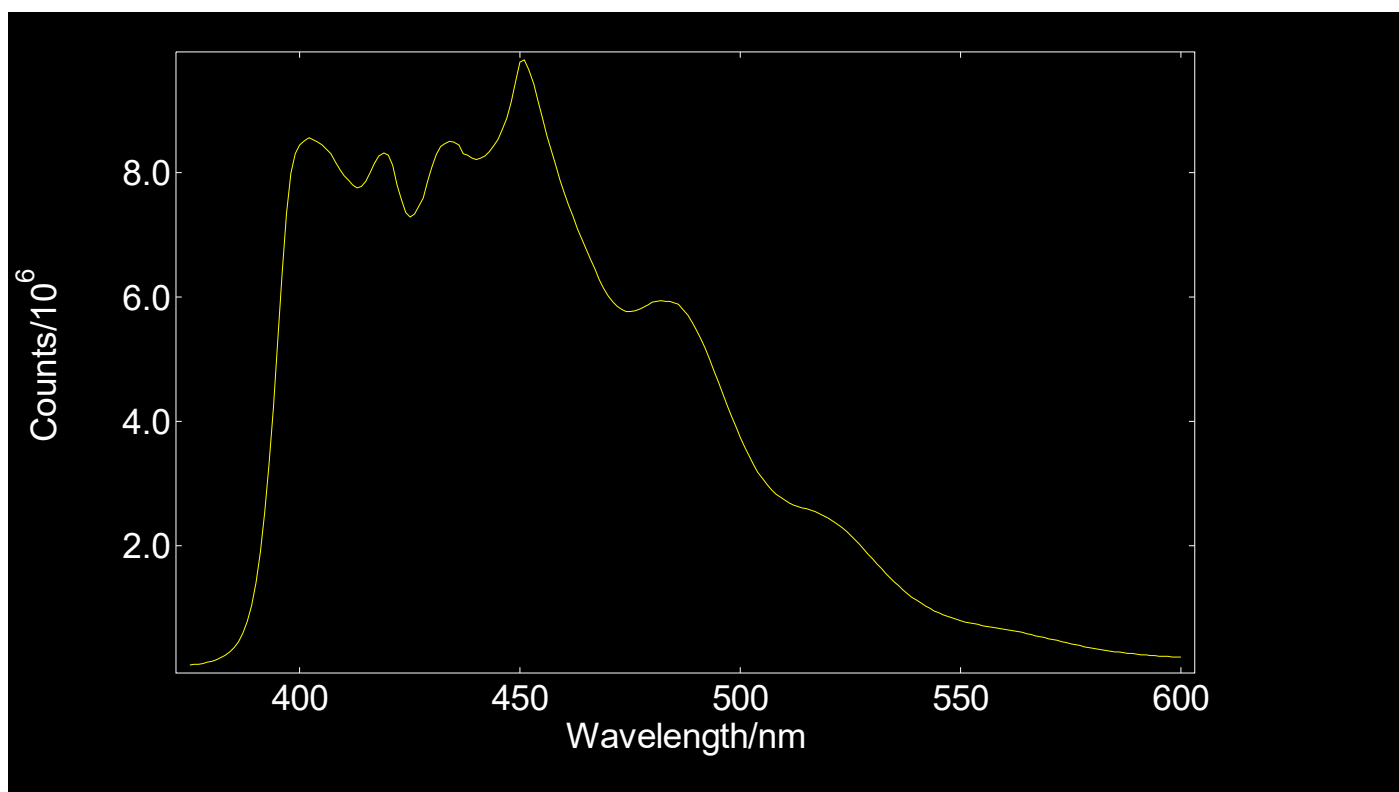

**Figure S36.** Emission spectrum of the compound **8c** in cyclohexane.

## 6. Absorption vs emission spectra of the obtained compounds

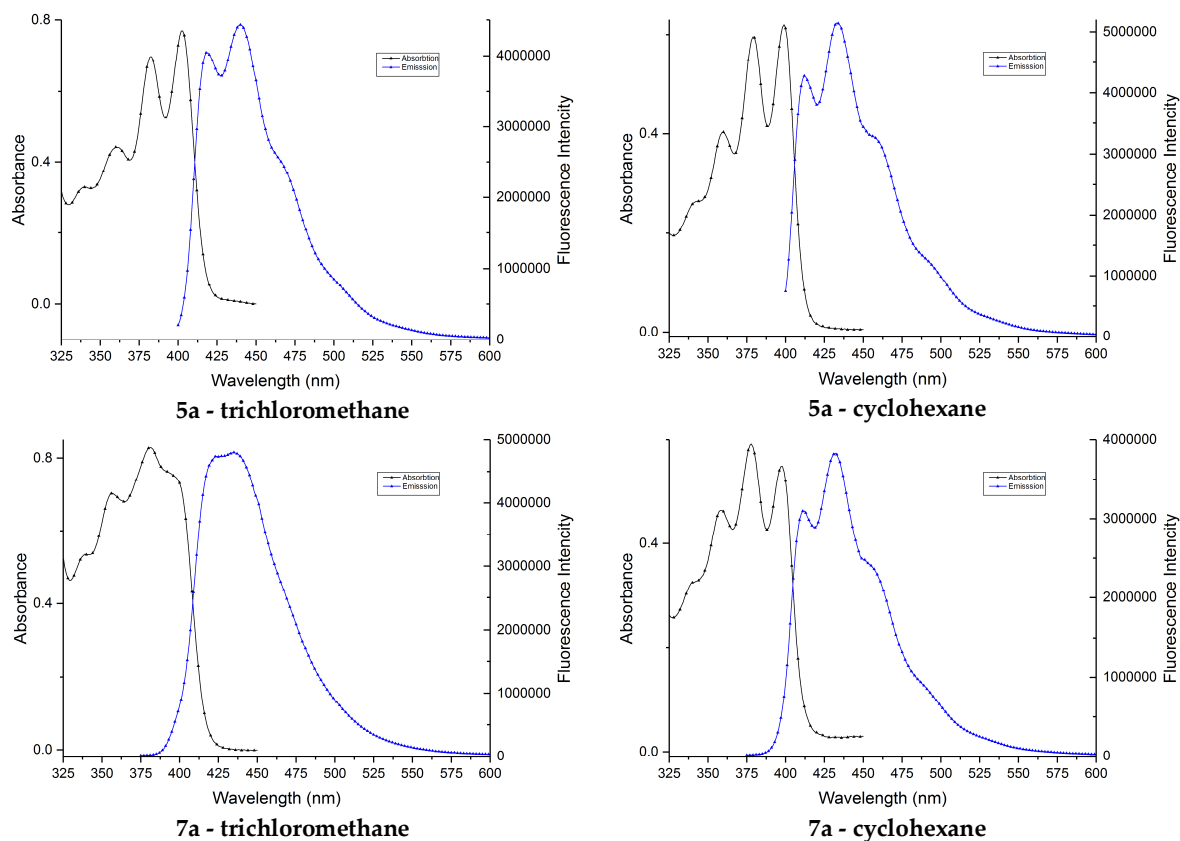

**Figure S37.** The absorption (black line) and emission (blue line) spectra of azasteroid derivatives **5a** and **7a** in trichloromethane (left column) and cyclohexane (right column). Excitation wavelength was: 396 nm for sample **5a** and 370 nm for samples **7b**.

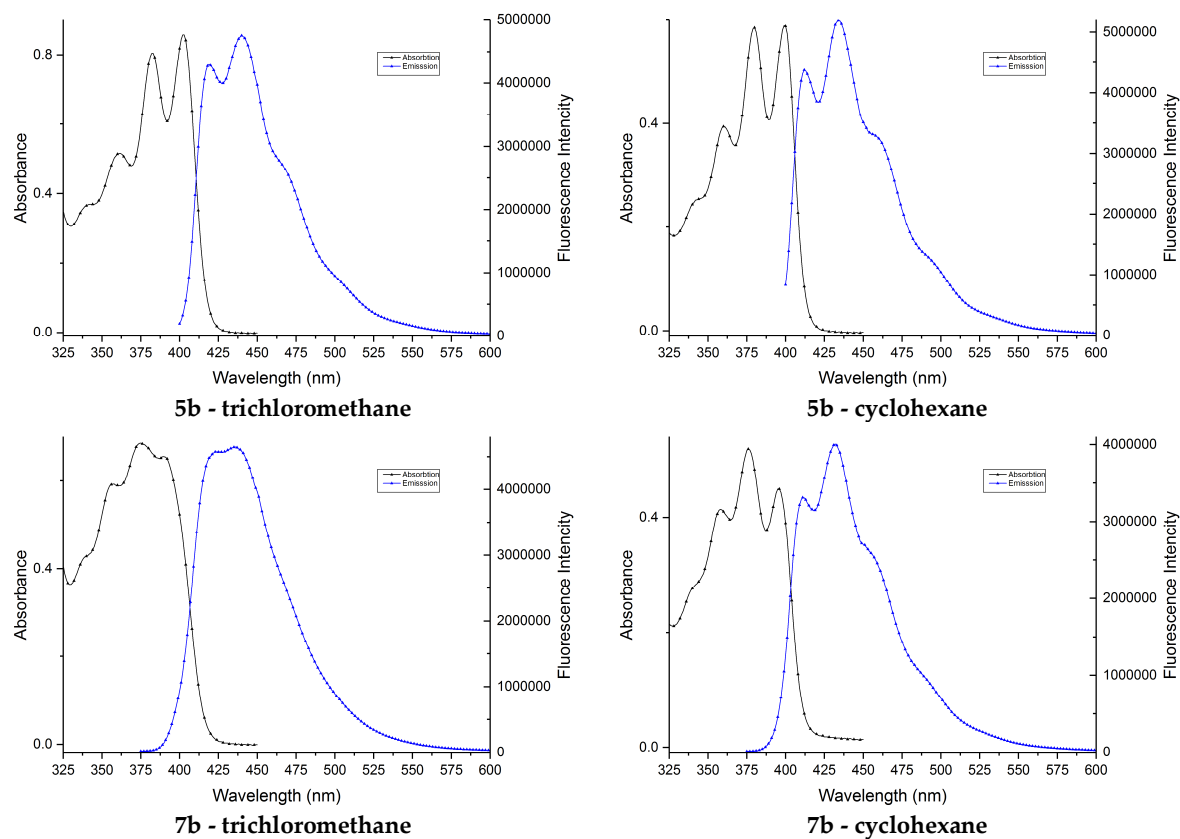

**Figure S38.** The absorption (black line) and emission (blue line) spectra of azasteroid derivatives **5b** and **7b** in trichloromethane (left column) and cyclohexane (right column). Excitation wavelength was: 396 nm for sample **5a** and 370 nm for samples **7b**.



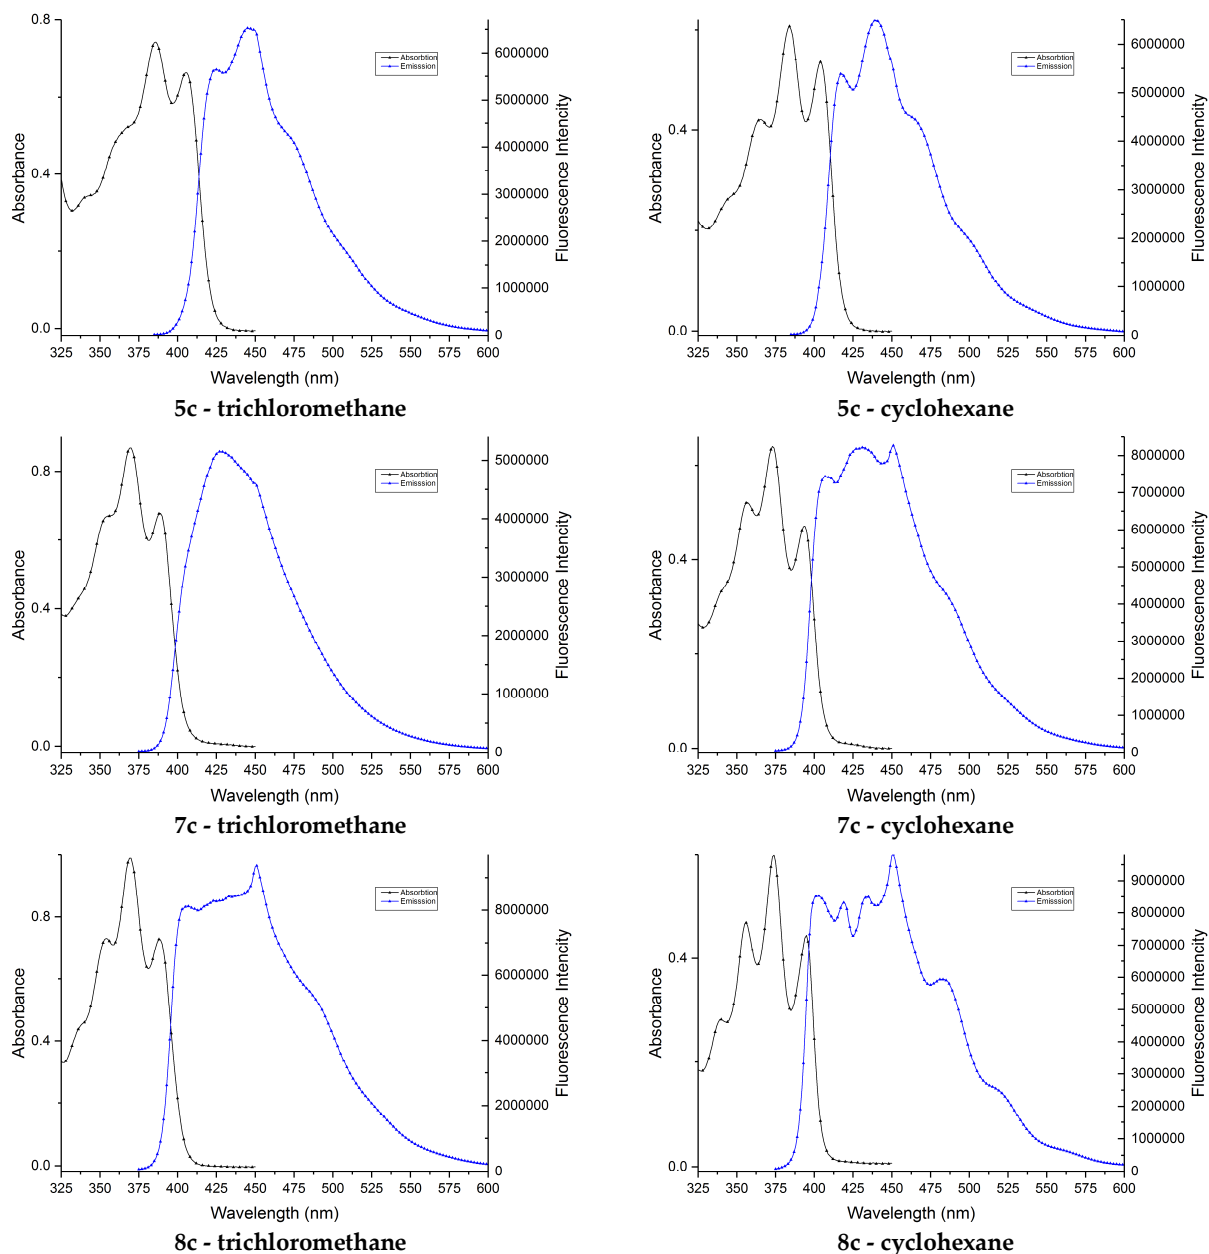

**Figure S39.** The absorption (black line) and emission (blue line) spectra of azasteroid derivatives **5c**, **7c** and **8c** in trichloromethane (left column) and cyclohexane (right column). Excitation wavelength was: 380 nm for sample **5c** and 365 nm for samples **7c** and **8c**.
